# Supplementary material for: Flexible, Front-Facing Luminescent Solar Concentrators Fabricated from Lumogen F Red 305 and Polydimethylsiloxane
Source: Hindawi journal article supplement (doi:10.1155/2019/8680931), 2019-04-30
Supplement: f1 [file 8680931.f1.xlsx]

## Sheet: Figure 4
Bulk-Doped Waveguide Concentration (g/l)	Bulk-Doped Light Gain		Thin-Film Waveguide Concentration (g/l)	Thin-Film Light Gain
0.02	1.63331		0.25	1.73433
0.02	1.62662		0.25	1.77278
0.02	1.62399		0.25	1.73076
0.05	1.7485		0.375	1.797
0.05	1.73693		0.375	1.83542
0.05	1.72105		0.375	1.75319
0.075	1.80838		0.5	1.84717
0.075	1.86217		0.5	1.84389
0.075	1.79075		0.5	1.85401
0.1	1.82971		0.65	1.85127
0.1	1.80867		0.65	1.86355
0.1	1.80912		0.65	1.88532
0.175	1.81025		0.75	1.82097
0.175	1.85419		0.75	1.84017
0.175	1.84259		0.75	1.85346
0.25	1.69391		0.85	1.76162
0.25	1.73407		0.85	1.74565
0.25	1.71586		0.85	1.75824
0.5	1.49328		1	1.66474
0.5	1.50017		1	1.69915
0.5	1.48701		1	1.68051

## Sheet: Figure 5
Bulk-Doped 0.075g/l Reference Cell			Bulk-Doped 0.075g/l LSC			Thin-Film 0.65g/l Reference Cell			Thin-Film 0.65g/l LSC
Voltage (V)	Current (A)		Voltage (V)	Current (A)		Voltage (V)	Current (A)		Voltage (V)	Current (A)
7.15256e-06	0.0288022		-3.57628e-05	0.0536854		-2.0504e-05	0.0314098		-2.7895e-05	0.0592353
0.00669193	0.0288049		0.00665116	0.0536228		0.00666475	0.031351		0.00666285	0.0591963
0.013412	0.0287758		0.0133665	0.0536281		0.0133822	0.0312631		0.0133808	0.0591595
0.0201325	0.0287876		0.0200887	0.0535606		0.0201047	0.0312413		0.0201004	0.0590733
0.0268517	0.0287645		0.0268104	0.05357		0.026824	0.0311707		0.0268183	0.0589915
0.0335417	0.0287578		0.0335	0.0535083		0.0335147	0.0311126		0.0335112	0.0589331
0.0402265	0.0287108		0.0401826	0.0534949		0.0401983	0.0309937		0.0401928	0.058818
0.0469832	0.0286943		0.0469379	0.0534464		0.0469537	0.0309565		0.0469499	0.0588485
0.053669	0.0286729		0.0536206	0.0534359		0.0536392	0.0308662		0.0536373	0.0588189
0.0603902	0.0286299		0.060344	0.0533628		0.0603592	0.0307875		0.0603552	0.0587426
0.0670681	0.0286196		0.067023	0.053362		0.0670395	0.0307067		0.0670347	0.0586684
0.0738242	0.0286003		0.0737753	0.0533127		0.0737932	0.030602		0.0737894	0.0585012
0.0805106	0.0285586		0.0804617	0.0532986		0.0804803	0.030496		0.0804758	0.0584859
0.08723	0.0284975		0.087182	0.0532243		0.0872011	0.0303857		0.0871964	0.0584469
0.0939145	0.0284795		0.0938644	0.0531661		0.0938845	0.0302363		0.0938768	0.0583965
0.100605	0.0284349		0.100556	0.0531212		0.100575	0.0301336		0.100571	0.0582601
0.10736	0.0283868		0.107309	0.0530528		0.107328	0.0300239		0.107324	0.0582125
0.114044	0.0283607		0.113997	0.0529765		0.114015	0.0298464		0.114007	0.0580856
0.120766	0.0282881		0.120715	0.0529083		0.120735	0.0296855		0.12073	0.0579228
0.127451	0.0282301		0.127402	0.052812		0.127419	0.0295565		0.127415	0.057713
0.13421	0.0281708		0.134159	0.0527227		0.134178	0.0293647		0.134173	0.057677
0.140904	0.0281021		0.140854	0.0526496		0.140873	0.0291259		0.140865	0.0575559
0.147596	0.028025		0.147547	0.0525095		0.147567	0.0289596		0.147561	0.0574278
0.154322	0.027923		0.154271	0.0524325		0.154291	0.0287148		0.154284	0.0572768
0.161016	0.0278482		0.160967	0.052302		0.160985	0.0285018		0.160979	0.0571338
0.167778	0.0277331		0.167727	0.0521682		0.167745	0.0282528		0.16774	0.056957
0.174474	0.0276448		0.174426	0.052028		0.174444	0.0280292		0.174437	0.0567425
0.181166	0.027536		0.181115	0.0518972		0.181134	0.0277364		0.181127	0.0564295
0.187892	0.0273889		0.187843	0.0517016		0.187861	0.0274463		0.187856	0.0562257
0.194654	0.0272559		0.194602	0.0515567		0.194622	0.0271216		0.194616	0.0560239
0.201346	0.0271246		0.201295	0.051334		0.201315	0.0267809		0.201309	0.0558221
0.208031	0.0269809		0.207979	0.0510325		0.208	0.0264115		0.207994	0.0555443
0.214724	0.0267994		0.214673	0.0508441		0.214691	0.0260263		0.214687	0.0552557
0.221484	0.0266115		0.221434	0.0506223		0.221453	0.0256464		0.221446	0.0549405
0.228212	0.0264089		0.228162	0.0504019		0.228181	0.0252558		0.228175	0.0544935
0.234904	0.0261796		0.234854	0.0500928		0.234874	0.0247921		0.234867	0.0542211
0.241597	0.0259429		0.241549	0.0497986		0.241567	0.0243175		0.241561	0.0538366
0.248325	0.0257047		0.248276	0.0494587		0.248295	0.0237787		0.24829	0.053463
0.255052	0.0254026		0.255002	0.0491004		0.255022	0.0232167		0.255016	0.0530246
0.261779	0.0250916		0.261729	0.0487102		0.261748	0.022656		0.261742	0.0525773
0.26847	0.0247902		0.268421	0.048334		0.268439	0.0220414		0.268434	0.0520586
0.275165	0.0244412		0.275115	0.0478943		0.275134	0.0213676		0.275128	0.0514827
0.281922	0.0240482		0.281871	0.0474401		0.281891	0.0207076		0.281886	0.0508225
0.288608	0.0236393		0.288558	0.0469437		0.288578	0.0199854		0.288572	0.0502707
0.295328	0.0232035		0.295277	0.0463753		0.295296	0.0192019		0.295291	0.0496125
0.302014	0.0227236		0.301962	0.0458302		0.301982	0.0183754		0.301976	0.0489286
0.3087	0.0222464		0.308648	0.0453053		0.308668	0.0174778		0.308663	0.0481898
0.315458	0.0217026		0.315406	0.0446149		0.315428	0.0165289		0.315422	0.0473768
0.322143	0.0211362		0.32209	0.0439323		0.322111	0.0156042		0.322105	0.0465936
0.328863	0.0205266		0.328811	0.0431982		0.328832	0.0145875		0.328826	0.0456549
0.335548	0.0198721		0.335495	0.0424265		0.335516	0.0135415		0.33551	0.0446769
0.342304	0.0191704		0.342251	0.0416201		0.342272	0.0124105		0.342266	0.0437107
0.348984	0.0184544		0.348931	0.0407869		0.348952	0.0112143		0.348946	0.0426632
0.355704	0.0176737		0.355651	0.0399024		0.355672	0.0099212		0.355665	0.0415732
0.36239	0.0168567		0.362336	0.0389342		0.362358	0.0086078		0.362351	0.0404061
0.369146	0.0159785		0.369091	0.0379699		0.369114	0.0072502		0.369107	0.0391453
0.375832	0.0150647		0.375777	0.0369332		0.3758	0.0058344		0.375793	0.0378027
0.38252	0.014109		0.382465	0.03586		0.382489	0.0043231		0.382481	0.0364286
0.389241	0.0131021		0.389186	0.0347359		0.389208	0.0027575		0.389201	0.0349865
0.395927	0.0120534		0.395873	0.0335538		0.395897	0.0011184		0.395889	0.0334932
0.402683	0.010915		0.402628	0.0323587		0.40265	-0.000577		0.402644	0.031931
0.409367	0.0097732		0.409312	0.0311051		0.409336	-0.002383		0.409328	0.0302857
0.416059	0.0085604		0.416003	0.0297779		0.416027	-0.004243		0.416018	0.0285423
0.422789	0.0073043		0.422731	0.0283989		0.422757	-0.006199		0.422749	0.0267687
0.429515	0.0060186		0.429459	0.026997		0.429483	-0.008207		0.429476	0.0248552
0.436242	0.0046591		0.436186	0.0255137		0.43621	-0.010266		0.436202	0.0228583
0.442935	0.0032364		0.442878	0.0240281		0.442903	-0.012421		0.442896	0.0208347
0.449627	0.0017856		0.449571	0.0224692		0.449595	-0.014628		0.449588	0.0187623
0.456392	0.0002695		0.456337	0.0208061		0.456361	-0.016944		0.456354	0.0166036
0.46312	-0.001287		0.463064	0.0191294		0.463088	-0.019325		0.463081	0.0143441
0.469811	-0.002922		0.469756	0.0175083		0.469779	-0.021812		0.469774	0.0120281
0.476504	-0.004601		0.476448	0.0156989		0.476472	-0.024353		0.476466	0.00963188
0.483231	-0.006345		0.483177	0.0137849		0.4832	-0.02696		0.483195	0.00699554
0.489953	-0.008156		0.489898	0.0118403		0.489922	-0.029664		0.489916	0.00433124
0.496678	-0.010007		0.496624	0.0098526		0.496647	-0.032462		0.496642	0.00164158
0.503371	-0.011904		0.503316	0.007794		0.50334	-0.0353213		0.503334	-0.0010245
0.510064	-0.013915		0.51001	0.00564802		0.510033	-0.038291		0.510027	-0.0039037
0.516827	-0.015988		0.516773	0.0033876		0.516797	-0.041374		0.51679	-0.0069343
0.523521	-0.01813		0.523467	0.0010423		0.52349	-0.0445027		0.523484	-0.0100058
0.530248	-0.02036		0.530193	-0.001377		0.530218	-0.047814		0.530213	-0.0132591
0.536941	-0.022693		0.536887	-0.003959		0.53691	-0.051193		0.536905	-0.0166923
0.543634	-0.025143		0.543581	-0.006648		0.543606	-0.054708		0.543599	-0.0201569
0.550393	-0.027732		0.550341	-0.009473		0.550364	-0.058419		0.550358	-0.0238398
0.557089	-0.030418		0.557035	-0.012445		0.55706	-0.062247		0.557053	-0.0276944
0.56381	-0.03327		0.563756	-0.015612		0.563781	-0.066268		0.563775	-0.0317996
0.570497	-0.036268		0.570442	-0.018929		0.570467	-0.070551		0.570461	-0.0361063
0.577253	-0.039493		0.577198	-0.022481		0.577224	-0.075122		0.577217	-0.0408228
0.583937	-0.04285		0.583883	-0.026213		0.583908	-0.079993		0.583902	-0.0458014
0.590661	-0.046469		0.590607	-0.030199		0.590632	-0.085167		0.590625	-0.0512297
0.597349	-0.050298		0.597294	-0.034374		0.597321	-0.09076		0.597314	-0.057013
0.604104	-0.054401		0.604049	-0.03886		0.604077	-0.096892		0.60407	-0.0633875
0.61079	-0.058739		0.610734	-0.043552		0.610762	-0.103599		0.610756	-0.0703118
0.617476	-0.063338		0.617421	-0.048475		0.61195	-0.104992		0.617442	-0.0778598
0.624197	-0.068268		0.624142	-0.053799		0.611841	-0.104992		0.624164	-0.0861962
0.63088	-0.0734973		0.630824	-0.05939		0.611685	-0.104992		0.630846	-0.0953463
0.637634	-0.079111		0.637578	-0.065348		0.611608	-0.104992		0.63714	-0.104976
0.644321	-0.085022		0.644265	-0.071573		0.611508	-0.104992		0.637029	-0.104992
0.651009	-0.091318		0.650953	-0.078167		0.611436	-0.104992		0.636962	-0.104992
0.657731	-0.098053		0.657675	-0.08518		0.611335	-0.104992		0.636899	-0.104992
0.664195	-0.104987		0.664397	-0.09259		0.611237	-0.104992		0.636835	-0.104992
0.66409	-0.104994		0.671119	-0.100411		0.611121	-0.104992		0.636753	-0.104992
0.663984	-0.104994		0.674789	-0.104991		0.611054	-0.104992		0.636662	-0.104992
0.663881	-0.104994		0.6747	-0.10499		0.610916	-0.104992		0.636546	-0.104992
0.66379	-0.104994		0.674621	-0.104991		0.610859	-0.104992		0.636483	-0.104992
0.663695	-0.104994		0.674531	-0.10499		0.610789	-0.104992		0.636436	-0.104992
0.663607	-0.104994		0.674435	-0.10499		0.610724	-0.104992		0.636357	-0.104992
0.663515	-0.104994		0.674364	-0.10499		0.61065	-0.104992		0.636304	-0.104992
0.663432	-0.104994		0.674291	-0.10499		0.610602	-0.104992		0.636236	-0.104992
0.663341	-0.104994		0.674211	-0.10499		0.610496	-0.104992		0.636166	-0.104992
0.663257	-0.104994		0.674148	-0.10499		0.61046	-0.104992		0.636067	-0.104992
0.663183	-0.104994		0.674071	-0.10499		0.610372	-0.104992		0.635964	-0.104992
0.663114	-0.104994		0.673999	-0.10499		0.610289	-0.104992		0.635928	-0.104992
0.663033	-0.104994		0.673932	-0.10499		0.61024	-0.104992		0.635872	-0.104992
0.662952	-0.104994		0.673864	-0.10499		0.61016	-0.104992		0.635819	-0.104992
0.66288	-0.104994		0.673797	-0.10499		0.610091	-0.104992		0.635749	-0.104992
0.662818	-0.104994		0.67373	-0.10499		0.609997	-0.104992		0.635696	-0.104992
0.662749	-0.104994		0.673666	-0.10499		0.609953	-0.104992		0.635614	-0.104992
0.662669	-0.104994		0.6736	-0.10499		0.609885	-0.104992		0.635503	-0.104992
0.662614	-0.104994		0.673537	-0.10499		0.609807	-0.104992		0.635451	-0.104992
0.662543	-0.104994		0.673481	-0.10499		0.609761	-0.104992		0.635443	-0.104992
0.662477	-0.104994		0.673426	-0.10499		0.60973	-0.104992		0.635386	-0.104992
0.662411	-0.104994		0.673368	-0.10499		0.609692	-0.104992		0.635326	-0.104992
0.66235	-0.104994		0.673301	-0.10499		0.609617	-0.104992		0.635277	-0.104992
0.662295	-0.104994		0.673243	-0.10499		0.609603	-0.104992		0.635218	-0.104992
0.662232	-0.104994		0.673184	-0.10499		0.609551	-0.104992		0.635147	-0.104992
0.662171	-0.104994		0.673123	-0.10499		0.609477	-0.104992		0.635084	-0.104992
0.66213	-0.104994		0.673072	-0.10499		0.609435	-0.104992		0.635036	-0.104992
0.662063	-0.104994		0.673009	-0.10499		0.609377	-0.104992		0.634988	-0.104992
0.662007	-0.104994		0.672963	-0.10499		0.609349	-0.104992		0.634934	-0.104992
0.661951	-0.104994		0.672903	-0.10499		0.609306	-0.104992		0.63488	-0.104992
0.661894	-0.104994		0.672852	-0.10499		0.609293	-0.104992		0.634841	-0.104992
0.661847	-0.104994		0.672799	-0.10499		0.609247	-0.104992		0.634742	-0.104992
0.661799	-0.104994		0.672736	-0.10499		0.609198	-0.104992		0.634667	-0.104992
0.66173	-0.104994		0.672683	-0.10499		0.609142	-0.104992		0.634604	-0.104992
0.66169	-0.104994		0.672628	-0.10499		0.609111	-0.104992		0.634587	-0.104992
0.661646	-0.104994		0.672579	-0.10499		0.609044	-0.104992		0.634544	-0.104992
0.66159	-0.104994		0.672526	-0.10499		0.609048	-0.104992		0.63451	-0.104992
0.661545	-0.104994		0.67248	-0.10499		0.608997	-0.104992		0.634448	-0.104992
0.661493	-0.104994		0.672457	-0.10499		0.608956	-0.104992		0.634399	-0.104992
0.661452	-0.104994		0.672391	-0.10499		0.608923	-0.104992		0.634347	-0.104992
0.661409	-0.104994		0.672335	-0.10499		0.608898	-0.104992		0.634274	-0.104992
0.661372	-0.104994		0.672281	-0.10499		0.608872	-0.104992		0.634256	-0.104992
0.661319	-0.104994		0.672225	-0.10499		0.608798	-0.104992		0.634203	-0.104992
0.661278	-0.104994		0.672181	-0.10499		0.608722	-0.104992		0.634169	-0.104992
0.661254	-0.104994		0.672135	-0.10499		0.60872	-0.104992		0.634108	-0.104992
0.6612	-0.104994		0.672082	-0.10499		0.608727	-0.104992		0.634061	-0.104992
0.661154	-0.104994		0.672033	-0.10499		0.608705	-0.104992		0.634014	-0.104992
0.661107	-0.104994		0.671997	-0.10499		0.60868	-0.104992		0.633932	-0.104992
0.661071	-0.104994		0.671942	-0.10499		0.608638	-0.104992		0.633906	-0.104992
0.661033	-0.104994		0.671895	-0.10499		0.608643	-0.104992		0.633859	-0.104992

## Sheet: Figure 6
Wavelength (nm)	Undoped Waveguide Absorbance (OD)	0.075g/l Bulk-Doped Waveguide Absorbance (OD)	0.65g/l Thin-Film Waveguide Absorbance (OD)
350.169	0.05	0.19	0.14
350.534	0.05	0.19	0.14
350.9	0.05	0.19	0.14
351.265	0.05	0.19	0.14
351.63	0.05	0.19	0.14
351.995	0.05	0.19	0.14
352.36	0.05	0.19	0.14
352.725	0.05	0.19	0.15
353.09	0.05	0.19	0.14
353.455	0.05	0.19	0.14
353.82	0.05	0.19	0.14
354.184	0.05	0.19	0.14
354.549	0.05	0.19	0.14
354.914	0.05	0.19	0.14
355.279	0.05	0.19	0.14
355.643	0.05	0.19	0.14
356.008	0.05	0.19	0.14
356.372	0.05	0.19	0.14
356.737	0.05	0.18	0.14
357.102	0.05	0.18	0.14
357.466	0.05	0.18	0.14
357.83	0.05	0.18	0.14
358.195	0.05	0.18	0.14
358.559	0.05	0.18	0.14
358.923	0.05	0.18	0.14
359.288	0.05	0.18	0.14
359.652	0.05	0.18	0.14
360.016	0.05	0.18	0.14
360.38	0.05	0.18	0.14
360.744	0.05	0.18	0.14
361.108	0.05	0.18	0.14
361.473	0.05	0.18	0.14
361.837	0.05	0.18	0.14
362.2	0.05	0.18	0.14
362.564	0.05	0.18	0.14
362.928	0.05	0.18	0.14
363.292	0.05	0.18	0.14
363.656	0.05	0.18	0.14
364.02	0.05	0.18	0.14
364.383	0.05	0.18	0.14
364.747	0.05	0.18	0.14
365.111	0.05	0.18	0.14
365.474	0.05	0.18	0.14
365.838	0.05	0.18	0.14
366.201	0.05	0.18	0.14
366.565	0.05	0.18	0.14
366.928	0.05	0.18	0.14
367.292	0.05	0.18	0.14
367.655	0.05	0.18	0.14
368.018	0.05	0.18	0.14
368.382	0.05	0.18	0.14
368.745	0.05	0.18	0.14
369.108	0.05	0.18	0.14
369.471	0.05	0.18	0.14
369.834	0.05	0.18	0.14
370.198	0.05	0.18	0.14
370.561	0.05	0.18	0.14
370.924	0.05	0.18	0.14
371.287	0.05	0.18	0.14
371.65	0.05	0.18	0.14
372.012	0.05	0.18	0.14
372.375	0.05	0.18	0.14
372.738	0.05	0.18	0.14
373.101	0.05	0.18	0.14
373.464	0.05	0.18	0.14
373.826	0.05	0.18	0.14
374.189	0.05	0.18	0.14
374.552	0.05	0.18	0.14
374.914	0.05	0.18	0.14
375.277	0.05	0.18	0.14
375.639	0.05	0.18	0.14
376.002	0.05	0.18	0.14
376.364	0.05	0.18	0.14
376.726	0.05	0.18	0.14
377.089	0.05	0.18	0.14
377.451	0.05	0.18	0.14
377.813	0.05	0.18	0.14
378.175	0.05	0.18	0.14
378.538	0.05	0.18	0.14
378.9	0.05	0.18	0.14
379.262	0.05	0.18	0.14
379.624	0.05	0.18	0.14
379.986	0.05	0.18	0.14
380.348	0.05	0.19	0.14
380.71	0.05	0.19	0.14
381.072	0.05	0.19	0.14
381.434	0.05	0.19	0.14
381.795	0.05	0.19	0.14
382.157	0.05	0.19	0.14
382.519	0.05	0.19	0.14
382.881	0.05	0.19	0.14
383.242	0.05	0.19	0.14
383.604	0.05	0.19	0.15
383.965	0.05	0.19	0.15
384.327	0.05	0.2	0.15
384.688	0.05	0.2	0.15
385.05	0.05	0.2	0.15
385.411	0.05	0.2	0.15
385.773	0.05	0.2	0.15
386.134	0.05	0.2	0.15
386.495	0.05	0.21	0.15
386.857	0.05	0.21	0.15
387.218	0.05	0.21	0.15
387.579	0.05	0.21	0.15
387.94	0.05	0.21	0.15
388.301	0.05	0.21	0.16
388.662	0.05	0.22	0.16
389.023	0.05	0.22	0.16
389.384	0.05	0.22	0.16
389.745	0.05	0.22	0.16
390.106	0.05	0.22	0.16
390.467	0.05	0.23	0.16
390.828	0.05	0.23	0.16
391.189	0.05	0.23	0.16
391.549	0.05	0.23	0.17
391.91	0.05	0.24	0.17
392.271	0.05	0.24	0.17
392.631	0.05	0.24	0.17
392.992	0.05	0.24	0.17
393.352	0.05	0.24	0.17
393.713	0.05	0.25	0.17
394.073	0.05	0.25	0.17
394.434	0.05	0.25	0.18
394.794	0.05	0.25	0.18
395.154	0.05	0.26	0.18
395.515	0.05	0.26	0.18
395.875	0.05	0.26	0.18
396.235	0.05	0.27	0.18
396.595	0.05	0.27	0.19
396.955	0.05	0.27	0.19
397.316	0.05	0.27	0.19
397.676	0.05	0.28	0.19
398.036	0.05	0.28	0.19
398.396	0.05	0.28	0.2
398.755	0.05	0.29	0.2
399.115	0.05	0.29	0.2
399.475	0.05	0.29	0.2
399.835	0.05	0.3	0.2
400.195	0.05	0.3	0.2
400.554	0.05	0.3	0.2
400.914	0.05	0.31	0.21
401.274	0.05	0.31	0.21
401.633	0.05	0.31	0.21
401.993	0.05	0.31	0.21
402.352	0.05	0.32	0.21
402.712	0.05	0.32	0.22
403.071	0.05	0.32	0.22
403.431	0.05	0.33	0.22
403.79	0.05	0.33	0.22
404.149	0.05	0.34	0.22
404.509	0.05	0.34	0.23
404.868	0.05	0.34	0.23
405.227	0.05	0.35	0.23
405.586	0.05	0.35	0.23
405.945	0.05	0.36	0.23
406.304	0.05	0.36	0.24
406.664	0.05	0.36	0.24
407.023	0.05	0.37	0.24
407.381	0.05	0.37	0.24
407.74	0.05	0.37	0.25
408.099	0.05	0.38	0.25
408.458	0.05	0.38	0.25
408.817	0.05	0.39	0.25
409.176	0.05	0.39	0.25
409.534	0.05	0.4	0.26
409.893	0.05	0.4	0.26
410.252	0.05	0.4	0.26
410.61	0.05	0.41	0.26
410.969	0.05	0.41	0.27
411.327	0.05	0.42	0.27
411.686	0.05	0.42	0.27
412.044	0.05	0.43	0.27
412.402	0.05	0.43	0.28
412.761	0.05	0.44	0.28
413.119	0.05	0.44	0.28
413.477	0.05	0.45	0.28
413.836	0.05	0.45	0.29
414.194	0.05	0.46	0.29
414.552	0.05	0.46	0.29
414.91	0.05	0.46	0.29
415.268	0.05	0.47	0.3
415.626	0.05	0.47	0.3
415.984	0.05	0.48	0.3
416.342	0.05	0.48	0.3
416.7	0.05	0.49	0.31
417.058	0.05	0.49	0.31
417.415	0.05	0.49	0.31
417.773	0.05	0.5	0.31
418.131	0.05	0.5	0.32
418.489	0.05	0.51	0.32
418.846	0.05	0.51	0.32
419.204	0.05	0.51	0.32
419.561	0.05	0.52	0.32
419.919	0.05	0.52	0.33
420.276	0.05	0.53	0.33
420.634	0.05	0.53	0.33
420.991	0.05	0.53	0.33
421.349	0.05	0.54	0.33
421.706	0.05	0.54	0.33
422.063	0.05	0.54	0.34
422.42	0.05	0.54	0.34
422.777	0.05	0.55	0.34
423.135	0.05	0.55	0.34
423.492	0.05	0.55	0.34
423.849	0.05	0.55	0.34
424.206	0.05	0.56	0.34
424.563	0.05	0.56	0.35
424.92	0.05	0.56	0.35
425.277	0.05	0.56	0.35
425.633	0.05	0.56	0.35
425.99	0.05	0.57	0.35
426.347	0.05	0.57	0.35
426.704	0.05	0.57	0.35
427.06	0.05	0.57	0.35
427.417	0.05	0.57	0.36
427.774	0.05	0.58	0.36
428.13	0.05	0.58	0.36
428.487	0.05	0.58	0.36
428.843	0.05	0.58	0.36
429.2	0.05	0.58	0.36
429.556	0.05	0.59	0.36
429.912	0.05	0.59	0.36
430.269	0.05	0.59	0.36
430.625	0.05	0.59	0.37
430.981	0.05	0.59	0.37
431.337	0.05	0.6	0.37
431.694	0.05	0.6	0.37
432.05	0.05	0.6	0.37
432.406	0.05	0.6	0.37
432.762	0.05	0.61	0.37
433.118	0.05	0.61	0.37
433.474	0.05	0.61	0.38
433.83	0.05	0.61	0.38
434.185	0.05	0.62	0.38
434.541	0.05	0.62	0.38
434.897	0.05	0.62	0.38
435.253	0.05	0.63	0.38
435.608	0.05	0.63	0.39
435.964	0.05	0.63	0.39
436.32	0.05	0.63	0.39
436.675	0.05	0.64	0.39
437.031	0.05	0.64	0.39
437.386	0.05	0.64	0.39
437.742	0.05	0.64	0.39
438.097	0.05	0.65	0.4
438.452	0.05	0.65	0.4
438.808	0.05	0.65	0.4
439.163	0.05	0.65	0.4
439.518	0.05	0.66	0.4
439.873	0.05	0.66	0.4
440.229	0.05	0.66	0.4
440.584	0.05	0.66	0.4
440.939	0.05	0.66	0.4
441.294	0.05	0.66	0.4
441.649	0.05	0.66	0.4
442.004	0.05	0.66	0.4
442.359	0.05	0.66	0.4
442.713	0.05	0.66	0.4
443.068	0.05	0.66	0.4
443.423	0.05	0.66	0.4
443.778	0.05	0.66	0.4
444.132	0.05	0.65	0.4
444.487	0.05	0.65	0.4
444.842	0.05	0.65	0.4
445.196	0.05	0.65	0.39
445.551	0.05	0.64	0.39
445.905	0.05	0.64	0.39
446.26	0.05	0.63	0.39
446.614	0.05	0.63	0.38
446.968	0.05	0.62	0.38
447.323	0.05	0.62	0.38
447.677	0.05	0.61	0.37
448.031	0.05	0.6	0.37
448.385	0.05	0.6	0.37
448.74	0.05	0.59	0.36
449.094	0.05	0.58	0.36
449.448	0.05	0.57	0.35
449.802	0.05	0.56	0.35
450.156	0.05	0.56	0.34
450.51	0.05	0.55	0.34
450.863	0.05	0.54	0.33
451.217	0.05	0.53	0.33
451.571	0.05	0.52	0.32
451.925	0.05	0.51	0.32
452.279	0.05	0.5	0.31
452.632	0.05	0.49	0.31
452.986	0.05	0.48	0.3
453.339	0.05	0.47	0.3
453.693	0.05	0.46	0.29
454.047	0.05	0.45	0.29
454.4	0.05	0.45	0.28
454.753	0.05	0.44	0.28
455.107	0.05	0.43	0.27
455.46	0.05	0.42	0.27
455.813	0.05	0.41	0.26
456.167	0.05	0.4	0.26
456.52	0.05	0.4	0.25
456.873	0.05	0.39	0.25
457.226	0.05	0.38	0.25
457.579	0.05	0.37	0.24
457.932	0.05	0.37	0.24
458.285	0.05	0.36	0.23
458.638	0.05	0.35	0.23
458.991	0.05	0.35	0.23
459.344	0.05	0.34	0.22
459.697	0.05	0.34	0.22
460.05	0.05	0.33	0.22
460.402	0.05	0.33	0.22
460.755	0.05	0.32	0.21
461.108	0.05	0.32	0.21
461.46	0.05	0.31	0.21
461.813	0.05	0.31	0.21
462.165	0.05	0.31	0.2
462.518	0.05	0.3	0.2
462.87	0.05	0.3	0.2
463.223	0.05	0.3	0.2
463.575	0.05	0.3	0.2
463.927	0.05	0.29	0.2
464.28	0.05	0.29	0.2
464.632	0.05	0.29	0.19
464.984	0.05	0.29	0.19
465.336	0.05	0.29	0.19
465.688	0.05	0.29	0.19
466.04	0.05	0.29	0.19
466.392	0.05	0.29	0.19
466.744	0.05	0.29	0.19
467.096	0.05	0.29	0.19
467.448	0.05	0.29	0.19
467.8	0.05	0.29	0.19
468.152	0.05	0.29	0.19
468.503	0.05	0.29	0.19
468.855	0.05	0.29	0.19
469.207	0.05	0.3	0.2
469.559	0.05	0.3	0.2
469.91	0.05	0.3	0.2
470.262	0.05	0.3	0.2
470.613	0.05	0.3	0.2
470.965	0.05	0.31	0.2
471.316	0.05	0.31	0.2
471.667	0.05	0.31	0.2
472.019	0.05	0.31	0.21
472.37	0.05	0.32	0.21
472.721	0.05	0.32	0.21
473.072	0.05	0.32	0.21
473.424	0.05	0.33	0.21
473.775	0.05	0.33	0.21
474.126	0.05	0.33	0.22
474.477	0.05	0.34	0.22
474.828	0.05	0.34	0.22
475.179	0.05	0.35	0.22
475.53	0.05	0.35	0.22
475.88	0.05	0.35	0.23
476.231	0.05	0.36	0.23
476.582	0.05	0.36	0.23
476.933	0.05	0.37	0.23
477.283	0.05	0.37	0.24
477.634	0.05	0.37	0.24
477.985	0.05	0.38	0.24
478.335	0.05	0.38	0.24
478.686	0.05	0.39	0.24
479.036	0.05	0.39	0.25
479.387	0.05	0.4	0.25
479.737	0.05	0.4	0.25
480.087	0.05	0.4	0.25
480.438	0.05	0.41	0.26
480.788	0.05	0.41	0.26
481.138	0.05	0.41	0.26
481.488	0.04	0.42	0.26
481.838	0.04	0.42	0.26
482.188	0.04	0.43	0.26
482.538	0.04	0.43	0.27
482.888	0.04	0.43	0.27
483.238	0.04	0.43	0.27
483.588	0.04	0.44	0.27
483.938	0.04	0.44	0.27
484.288	0.04	0.44	0.27
484.638	0.04	0.45	0.28
484.987	0.04	0.45	0.28
485.337	0.04	0.45	0.28
485.687	0.04	0.46	0.28
486.036	0.04	0.46	0.28
486.386	0.04	0.46	0.28
486.735	0.04	0.47	0.29
487.085	0.04	0.47	0.29
487.434	0.04	0.47	0.29
487.784	0.04	0.47	0.29
488.133	0.05	0.48	0.29
488.482	0.05	0.48	0.29
488.832	0.05	0.48	0.29
489.181	0.05	0.48	0.29
489.53	0.05	0.49	0.3
489.879	0.05	0.49	0.3
490.228	0.05	0.49	0.3
490.577	0.05	0.5	0.3
490.926	0.05	0.5	0.3
491.275	0.05	0.5	0.3
491.624	0.05	0.5	0.31
491.973	0.05	0.51	0.31
492.322	0.05	0.51	0.31
492.671	0.05	0.51	0.31
493.019	0.05	0.52	0.31
493.368	0.05	0.52	0.31
493.717	0.05	0.52	0.32
494.065	0.05	0.53	0.32
494.414	0.05	0.53	0.32
494.762	0.05	0.53	0.32
495.111	0.05	0.53	0.32
495.459	0.05	0.54	0.32
495.808	0.05	0.54	0.33
496.156	0.05	0.54	0.33
496.504	0.05	0.55	0.33
496.852	0.04	0.55	0.33
497.201	0.04	0.56	0.33
497.549	0.04	0.56	0.34
497.897	0.04	0.56	0.34
498.245	0.04	0.57	0.34
498.593	0.04	0.57	0.34
498.941	0.04	0.58	0.35
499.289	0.04	0.58	0.35
499.637	0.04	0.59	0.35
499.985	0.04	0.6	0.36
500.332	0.04	0.6	0.36
500.68	0.04	0.61	0.36
501.028	0.04	0.61	0.37
501.376	0.04	0.62	0.37
501.723	0.04	0.63	0.37
502.071	0.04	0.63	0.38
502.418	0.04	0.64	0.38
502.766	0.04	0.65	0.39
503.113	0.04	0.66	0.39
503.461	0.04	0.67	0.39
503.808	0.04	0.67	0.4
504.155	0.04	0.68	0.4
504.503	0.04	0.69	0.41
504.85	0.04	0.7	0.41
505.197	0.04	0.71	0.42
505.544	0.04	0.72	0.42
505.891	0.04	0.73	0.43
506.238	0.04	0.74	0.43
506.585	0.04	0.75	0.44
506.932	0.04	0.76	0.45
507.279	0.04	0.77	0.45
507.626	0.04	0.78	0.46
507.973	0.04	0.79	0.46
508.32	0.04	0.8	0.47
508.667	0.04	0.81	0.47
509.013	0.04	0.82	0.48
509.36	0.04	0.83	0.49
509.707	0.04	0.84	0.49
510.053	0.04	0.85	0.5
510.4	0.04	0.86	0.51
510.746	0.04	0.88	0.51
511.093	0.04	0.89	0.52
511.439	0.04	0.9	0.52
511.785	0.04	0.91	0.53
512.132	0.04	0.92	0.54
512.478	0.04	0.93	0.54
512.824	0.04	0.94	0.55
513.17	0.04	0.95	0.56
513.517	0.04	0.96	0.56
513.863	0.04	0.97	0.57
514.209	0.04	0.98	0.57
514.555	0.04	0.99	0.58
514.901	0.04	1	0.59
515.247	0.04	1.01	0.59
515.592	0.04	1.02	0.6
515.938	0.04	1.03	0.6
516.284	0.04	1.04	0.61
516.63	0.04	1.05	0.61
516.975	0.04	1.06	0.62
517.321	0.04	1.07	0.62
517.667	0.04	1.08	0.63
518.012	0.04	1.09	0.63
518.358	0.04	1.1	0.64
518.703	0.04	1.11	0.64
519.049	0.04	1.11	0.65
519.394	0.04	1.12	0.65
519.739	0.04	1.13	0.65
520.085	0.04	1.13	0.66
520.43	0.04	1.14	0.66
520.775	0.04	1.15	0.67
521.12	0.04	1.15	0.67
521.465	0.04	1.16	0.67
521.81	0.04	1.16	0.67
522.155	0.04	1.17	0.68
522.5	0.04	1.17	0.68
522.845	0.04	1.17	0.68
523.19	0.04	1.18	0.68
523.535	0.04	1.18	0.68
523.88	0.04	1.18	0.68
524.225	0.04	1.18	0.69
524.569	0.04	1.18	0.69
524.914	0.04	1.19	0.69
525.259	0.04	1.19	0.69
525.603	0.04	1.19	0.69
525.948	0.04	1.19	0.69
526.292	0.04	1.19	0.69
526.637	0.04	1.19	0.69
526.981	0.04	1.19	0.69
527.325	0.04	1.19	0.69
527.67	0.04	1.18	0.69
528.014	0.04	1.18	0.69
528.358	0.04	1.18	0.68
528.702	0.04	1.18	0.68
529.046	0.04	1.18	0.68
529.39	0.04	1.17	0.68
529.734	0.04	1.17	0.68
530.078	0.04	1.17	0.68
530.422	0.04	1.17	0.68
530.766	0.04	1.16	0.67
531.11	0.04	1.16	0.67
531.454	0.04	1.16	0.67
531.798	0.04	1.15	0.67
532.141	0.04	1.15	0.67
532.485	0.04	1.15	0.66
532.829	0.04	1.14	0.66
533.172	0.04	1.14	0.66
533.516	0.04	1.14	0.66
533.859	0.04	1.13	0.66
534.203	0.04	1.13	0.65
534.546	0.04	1.13	0.65
534.89	0.04	1.13	0.65
535.233	0.04	1.12	0.65
535.576	0.04	1.12	0.65
535.919	0.04	1.12	0.65
536.263	0.04	1.12	0.65
536.606	0.04	1.12	0.65
536.949	0.04	1.11	0.65
537.292	0.04	1.11	0.65
537.635	0.04	1.11	0.64
537.978	0.04	1.11	0.64
538.321	0.04	1.11	0.65
538.664	0.04	1.11	0.65
539.006	0.04	1.12	0.65
539.349	0.04	1.12	0.65
539.692	0.04	1.12	0.65
540.035	0.04	1.12	0.65
540.377	0.04	1.12	0.65
540.72	0.04	1.13	0.65
541.062	0.04	1.13	0.66
541.405	0.04	1.14	0.66
541.747	0.04	1.14	0.66
542.09	0.04	1.14	0.66
542.432	0.04	1.15	0.67
542.774	0.04	1.16	0.67
543.117	0.04	1.16	0.67
543.459	0.04	1.17	0.68
543.801	0.04	1.17	0.68
544.143	0.04	1.18	0.68
544.485	0.04	1.19	0.69
544.827	0.04	1.2	0.69
545.169	0.04	1.21	0.7
545.511	0.04	1.22	0.7
545.853	0.04	1.23	0.71
546.195	0.04	1.24	0.71
546.537	0.04	1.25	0.72
546.879	0.04	1.26	0.73
547.22	0.04	1.27	0.73
547.562	0.04	1.28	0.74
547.904	0.04	1.29	0.75
548.245	0.04	1.3	0.75
548.587	0.04	1.32	0.76
548.928	0.04	1.33	0.77
549.27	0.04	1.34	0.78
549.611	0.04	1.35	0.78
549.952	0.04	1.37	0.79
550.294	0.04	1.38	0.8
550.635	0.04	1.39	0.81
550.976	0.04	1.41	0.82
551.317	0.04	1.42	0.82
551.659	0.04	1.43	0.83
552	0.04	1.45	0.84
552.341	0.04	1.46	0.85
552.682	0.04	1.47	0.86
553.023	0.04	1.49	0.86
553.364	0.04	1.5	0.87
553.704	0.04	1.51	0.88
554.045	0.04	1.53	0.89
554.386	0.04	1.54	0.9
554.727	0.04	1.55	0.9
555.067	0.04	1.57	0.91
555.408	0.04	1.58	0.92
555.749	0.04	1.59	0.93
556.089	0.04	1.6	0.94
556.43	0.04	1.62	0.94
556.77	0.04	1.63	0.95
557.111	0.04	1.64	0.96
557.451	0.04	1.65	0.97
557.791	0.04	1.66	0.97
558.131	0.04	1.67	0.98
558.472	0.04	1.68	0.99
558.812	0.04	1.69	0.99
559.152	0.04	1.7	1
559.492	0.04	1.71	1
559.832	0.04	1.72	1.01
560.172	0.04	1.73	1.02
560.512	0.04	1.74	1.02
560.852	0.04	1.74	1.03
561.192	0.04	1.75	1.03
561.532	0.04	1.76	1.03
561.871	0.04	1.76	1.04
562.211	0.04	1.77	1.04
562.551	0.04	1.77	1.04
562.89	0.04	1.78	1.05
563.23	0.04	1.78	1.05
563.569	0.04	1.78	1.05
563.909	0.04	1.79	1.05
564.248	0.04	1.79	1.05
564.588	0.04	1.79	1.06
564.927	0.04	1.79	1.06
565.266	0.04	1.79	1.06
565.606	0.04	1.79	1.06
565.945	0.04	1.79	1.06
566.284	0.04	1.78	1.05
566.623	0.04	1.78	1.05
566.962	0.04	1.78	1.05
567.301	0.04	1.77	1.05
567.64	0.04	1.77	1.05
567.979	0.04	1.76	1.04
568.318	0.04	1.76	1.04
568.657	0.04	1.75	1.03
568.996	0.04	1.74	1.03
569.334	0.04	1.73	1.02
569.673	0.04	1.72	1.02
570.012	0.04	1.71	1.01
570.35	0.04	1.7	1
570.689	0.04	1.69	1
571.027	0.04	1.68	0.99
571.366	0.04	1.67	0.98
571.704	0.04	1.65	0.97
572.043	0.04	1.64	0.96
572.381	0.04	1.62	0.95
572.719	0.04	1.61	0.94
573.057	0.03	1.59	0.93
573.396	0.03	1.58	0.92
573.734	0.04	1.56	0.91
574.072	0.04	1.54	0.9
574.41	0.04	1.52	0.89
574.748	0.04	1.5	0.88
575.086	0.04	1.48	0.87
575.424	0.04	1.46	0.86
575.762	0.04	1.44	0.84
576.099	0.04	1.42	0.83
576.437	0.04	1.4	0.82
576.775	0.04	1.38	0.8
577.113	0.04	1.36	0.79
577.45	0.04	1.33	0.78
577.788	0.04	1.31	0.77
578.125	0.04	1.29	0.75
578.463	0.04	1.26	0.74
578.8	0.04	1.24	0.72
579.138	0.04	1.21	0.71
579.475	0.04	1.19	0.7
579.812	0.04	1.17	0.68
580.15	0.04	1.14	0.67
580.487	0.04	1.12	0.65
580.824	0.04	1.09	0.64
581.161	0.04	1.07	0.63
581.498	0.04	1.04	0.61
581.835	0.04	1.02	0.6
582.172	0.04	1	0.58
582.509	0.04	0.97	0.57
582.846	0.04	0.95	0.56
583.183	0.04	0.92	0.54
583.52	0.04	0.9	0.53
583.856	0.04	0.88	0.52
584.193	0.04	0.85	0.5
584.53	0.04	0.83	0.49
584.866	0.04	0.81	0.48
585.203	0.04	0.78	0.46
585.539	0.04	0.76	0.45
585.876	0.04	0.74	0.44
586.212	0.04	0.72	0.42
586.549	0.04	0.69	0.41
586.885	0.04	0.67	0.4
587.221	0.04	0.65	0.39
587.557	0.04	0.63	0.38
587.894	0.04	0.61	0.37
588.23	0.04	0.59	0.36
588.566	0.04	0.58	0.35
588.902	0.04	0.56	0.34
589.238	0.04	0.54	0.33
589.574	0.04	0.52	0.32
589.91	0.04	0.5	0.31
590.245	0.04	0.49	0.3
590.581	0.04	0.47	0.29
590.917	0.04	0.45	0.28
591.253	0.04	0.44	0.27
591.588	0.04	0.42	0.26
591.924	0.04	0.41	0.26
592.26	0.04	0.39	0.25
592.595	0.04	0.38	0.24
592.931	0.04	0.37	0.23
593.266	0.04	0.35	0.22
593.601	0.04	0.34	0.22
593.937	0.04	0.33	0.21
594.272	0.04	0.32	0.2
594.607	0.04	0.31	0.2
594.942	0.04	0.3	0.19
595.278	0.04	0.29	0.18
595.613	0.04	0.28	0.18
595.948	0.04	0.27	0.17
596.283	0.04	0.26	0.17
596.618	0.04	0.25	0.16
596.953	0.04	0.24	0.16
597.287	0.04	0.23	0.15
597.622	0.04	0.22	0.15
597.957	0.04	0.21	0.14
598.292	0.04	0.2	0.14
598.626	0.04	0.2	0.13
598.961	0.04	0.19	0.13
599.296	0.04	0.18	0.13
599.63	0.03	0.18	0.12
599.965	0.03	0.17	0.12
600.299	0.03	0.17	0.12
600.633	0.03	0.16	0.11
600.968	0.03	0.15	0.11
601.302	0.03	0.15	0.11
601.636	0.03	0.14	0.1
601.97	0.03	0.14	0.1
602.305	0.03	0.13	0.1
602.639	0.03	0.13	0.1
602.973	0.03	0.13	0.09
603.307	0.03	0.12	0.09
603.641	0.03	0.12	0.09
603.975	0.03	0.11	0.09
604.309	0.03	0.11	0.09
604.642	0.03	0.11	0.08
604.976	0.03	0.1	0.08
605.31	0.03	0.1	0.08
605.643	0.03	0.1	0.08
605.977	0.03	0.1	0.08
606.311	0.03	0.09	0.08
606.644	0.03	0.09	0.07
606.978	0.03	0.09	0.07
607.311	0.03	0.09	0.07
607.645	0.03	0.08	0.07
607.978	0.03	0.08	0.07
608.311	0.03	0.08	0.07
608.644	0.03	0.08	0.07
608.978	0.03	0.08	0.07
609.311	0.03	0.08	0.07
609.644	0.03	0.07	0.07
609.977	0.03	0.07	0.06
610.31	0.03	0.07	0.06
610.643	0.03	0.07	0.06
610.976	0.03	0.07	0.06
611.309	0.03	0.07	0.06
611.641	0.03	0.07	0.06
611.974	0.03	0.07	0.06
612.307	0.03	0.06	0.06
612.64	0.03	0.06	0.06
612.972	0.03	0.06	0.06
613.305	0.03	0.06	0.06
613.637	0.03	0.06	0.06
613.97	0.03	0.06	0.06
614.302	0.03	0.06	0.06
614.635	0.03	0.06	0.06
614.967	0.03	0.06	0.06
615.299	0.03	0.06	0.06
615.632	0.03	0.06	0.06
615.964	0.03	0.06	0.06
616.296	0.03	0.05	0.05
616.628	0.03	0.05	0.05
616.96	0.03	0.05	0.05
617.292	0.03	0.05	0.05
617.624	0.03	0.05	0.05
617.956	0.04	0.05	0.05
618.288	0.04	0.05	0.05
618.62	0.04	0.05	0.05
618.951	0.04	0.05	0.05
619.283	0.04	0.05	0.05
619.615	0.04	0.05	0.05
619.946	0.04	0.05	0.05
620.278	0.04	0.05	0.05
620.609	0.04	0.05	0.05
620.941	0.04	0.05	0.05
621.272	0.04	0.05	0.05
621.604	0.04	0.05	0.05
621.935	0.04	0.05	0.05
622.266	0.04	0.05	0.05
622.597	0.03	0.05	0.05
622.929	0.03	0.05	0.05
623.26	0.03	0.05	0.05
623.591	0.03	0.05	0.05
623.922	0.03	0.05	0.05
624.253	0.03	0.05	0.05
624.584	0.03	0.05	0.05
624.915	0.03	0.05	0.05
625.246	0.03	0.05	0.05
625.576	0.03	0.05	0.05
625.907	0.03	0.05	0.05
626.238	0.03	0.05	0.05
626.568	0.03	0.05	0.05
626.899	0.03	0.05	0.05
627.23	0.03	0.05	0.05
627.56	0.03	0.05	0.05
627.891	0.03	0.05	0.05
628.221	0.03	0.05	0.05
628.551	0.03	0.05	0.05
628.882	0.03	0.05	0.05
629.212	0.03	0.05	0.05
629.542	0.03	0.05	0.05
629.872	0.03	0.05	0.05
630.202	0.03	0.05	0.05
630.533	0.03	0.05	0.05
630.863	0.03	0.05	0.05
631.193	0.03	0.05	0.05
631.522	0.03	0.05	0.05
631.852	0.03	0.04	0.05
632.182	0.03	0.04	0.05
632.512	0.03	0.04	0.05
632.842	0.03	0.04	0.05
633.171	0.03	0.04	0.05
633.501	0.03	0.04	0.05
633.831	0.03	0.04	0.05
634.16	0.03	0.04	0.05
634.49	0.03	0.04	0.05
634.819	0.03	0.04	0.05
635.148	0.03	0.04	0.05
635.478	0.03	0.04	0.05
635.807	0.03	0.04	0.05
636.136	0.03	0.04	0.05
636.466	0.03	0.04	0.05
636.795	0.04	0.04	0.05
637.124	0.04	0.04	0.05
637.453	0.04	0.04	0.05
637.782	0.04	0.04	0.05
638.111	0.04	0.04	0.05
638.44	0.04	0.04	0.05
638.769	0.04	0.04	0.05
639.097	0.04	0.04	0.05
639.426	0.04	0.04	0.05
639.755	0.04	0.04	0.05
640.083	0.04	0.04	0.05
640.412	0.04	0.04	0.05
640.741	0.04	0.04	0.05
641.069	0.04	0.04	0.05
641.398	0.04	0.04	0.05
641.726	0.04	0.04	0.05
642.054	0.04	0.04	0.05
642.383	0.04	0.04	0.05
642.711	0.04	0.04	0.05
643.039	0.04	0.04	0.05
643.367	0.04	0.04	0.05
643.696	0.04	0.04	0.05
644.024	0.04	0.04	0.05
644.352	0.04	0.04	0.05
644.68	0.04	0.04	0.05
645.008	0.04	0.04	0.05
645.335	0.04	0.04	0.05
645.663	0.04	0.04	0.05
645.991	0.04	0.05	0.05
646.319	0.04	0.05	0.05
646.646	0.04	0.05	0.05
646.974	0.04	0.05	0.05
647.302	0.04	0.05	0.05
647.629	0.04	0.05	0.05
647.957	0.04	0.05	0.05
648.284	0.04	0.05	0.05
648.612	0.04	0.05	0.05
648.939	0.04	0.05	0.05
649.266	0.04	0.05	0.05
649.593	0.04	0.05	0.05
649.921	0.04	0.04	0.05
650.248	0.04	0.04	0.05
650.575	0.04	0.04	0.05
650.902	0.04	0.04	0.05
651.229	0.04	0.04	0.05
651.556	0.04	0.04	0.05
651.883	0.04	0.04	0.05
652.21	0.04	0.04	0.05
652.536	0.04	0.04	0.05
652.863	0.04	0.04	0.05
653.19	0.04	0.04	0.05
653.516	0.04	0.04	0.05
653.843	0.04	0.04	0.05
654.17	0.04	0.04	0.05
654.496	0.04	0.04	0.05
654.823	0.04	0.04	0.05
655.149	0.04	0.04	0.05
655.475	0.04	0.05	0.05
655.802	0.04	0.05	0.05
656.128	0.04	0.05	0.05
656.454	0.04	0.05	0.05
656.78	0.04	0.05	0.05
657.106	0.04	0.05	0.05
657.432	0.04	0.05	0.05
657.758	0.04	0.05	0.05
658.084	0.04	0.05	0.05
658.41	0.04	0.05	0.05
658.736	0.04	0.05	0.05
659.062	0.04	0.05	0.05
659.388	0.04	0.05	0.05
659.713	0.04	0.05	0.05
660.039	0.04	0.05	0.05
660.365	0.04	0.05	0.05
660.69	0.04	0.05	0.05
661.016	0.04	0.05	0.05
661.341	0.04	0.05	0.05
661.667	0.04	0.05	0.05
661.992	0.04	0.05	0.05
662.317	0.04	0.05	0.05
662.643	0.04	0.05	0.05
662.968	0.04	0.05	0.05
663.293	0.04	0.04	0.05
663.618	0.04	0.04	0.05
663.943	0.04	0.04	0.05
664.268	0.04	0.05	0.05
664.593	0.04	0.05	0.05
664.918	0.04	0.05	0.05
665.243	0.04	0.05	0.05
665.568	0.04	0.05	0.05
665.893	0.04	0.05	0.05
666.217	0.04	0.05	0.05
666.542	0.04	0.05	0.05
666.867	0.04	0.05	0.05
667.191	0.04	0.05	0.05
667.516	0.04	0.05	0.05
667.84	0.04	0.05	0.05
668.164	0.04	0.05	0.05
668.489	0.04	0.05	0.05
668.813	0.04	0.05	0.05
669.137	0.04	0.05	0.05
669.462	0.04	0.05	0.05
669.786	0.04	0.05	0.06
670.11	0.04	0.05	0.06
670.434	0.04	0.05	0.06
670.758	0.04	0.05	0.06
671.082	0.04	0.05	0.05
671.406	0.04	0.05	0.05
671.73	0.04	0.05	0.05
672.054	0.04	0.05	0.05
672.377	0.04	0.05	0.05
672.701	0.04	0.05	0.05
673.025	0.04	0.05	0.05
673.348	0.04	0.05	0.05
673.672	0.04	0.05	0.05
673.996	0.04	0.04	0.05
674.319	0.04	0.04	0.05
674.642	0.04	0.04	0.05
674.966	0.04	0.04	0.05
675.289	0.04	0.04	0.05
675.612	0.04	0.04	0.05
675.936	0.04	0.04	0.05
676.259	0.04	0.04	0.05
676.582	0.04	0.05	0.05
676.905	0.04	0.05	0.05
677.228	0.04	0.05	0.05
677.551	0.04	0.05	0.05
677.874	0.04	0.05	0.05
678.197	0.04	0.05	0.05
678.52	0.04	0.05	0.05
678.842	0.04	0.05	0.05
679.165	0.04	0.05	0.05
679.488	0.04	0.05	0.05
679.81	0.04	0.05	0.05
680.133	0.04	0.05	0.05
680.455	0.04	0.05	0.05
680.778	0.04	0.05	0.05
681.1	0.04	0.05	0.05
681.423	0.04	0.05	0.05
681.745	0.04	0.05	0.05
682.067	0.04	0.05	0.05
682.389	0.04	0.05	0.05
682.712	0.04	0.05	0.05
683.034	0.04	0.05	0.05
683.356	0.04	0.05	0.05
683.678	0.04	0.05	0.05
684	0.04	0.05	0.05
684.322	0.04	0.05	0.05
684.644	0.04	0.05	0.05
684.965	0.04	0.05	0.05
685.287	0.04	0.05	0.05
685.609	0.04	0.05	0.05
685.931	0.04	0.05	0.05
686.252	0.04	0.04	0.05
686.574	0.04	0.04	0.05
686.895	0.04	0.05	0.05
687.217	0.04	0.05	0.05
687.538	0.04	0.05	0.05
687.859	0.04	0.05	0.05
688.181	0.04	0.05	0.05
688.502	0.04	0.05	0.05
688.823	0.04	0.05	0.05
689.144	0.04	0.05	0.05
689.465	0.04	0.04	0.05
689.787	0.04	0.04	0.05
690.108	0.04	0.04	0.05
690.428	0.04	0.04	0.05
690.749	0.04	0.04	0.05
691.07	0.04	0.04	0.05
691.391	0.04	0.04	0.05
691.712	0.04	0.04	0.05
692.032	0.04	0.04	0.05
692.353	0.04	0.04	0.05
692.674	0.04	0.04	0.05
692.994	0.04	0.04	0.05
693.315	0.04	0.04	0.05
693.635	0.04	0.04	0.05
693.956	0.04	0.04	0.05
694.276	0.04	0.04	0.05
694.596	0.04	0.04	0.05
694.916	0.04	0.05	0.05
695.237	0.04	0.05	0.05
695.557	0.04	0.05	0.05
695.877	0.04	0.05	0.05
696.197	0.04	0.05	0.05
696.517	0.04	0.05	0.05
696.837	0.04	0.05	0.05
697.157	0.04	0.05	0.05
697.477	0.04	0.05	0.05
697.796	0.04	0.05	0.05
698.116	0.04	0.05	0.05
698.436	0.04	0.05	0.05
698.755	0.04	0.05	0.05
699.075	0.04	0.05	0.05
699.395	0.04	0.05	0.06
699.714	0.04	0.05	0.06
700.033	0.04	0.05	0.06
700.353	0.04	0.05	0.06
700.672	0.04	0.05	0.06
700.991	0.04	0.05	0.06
701.311	0.04	0.05	0.06
701.63	0.04	0.05	0.06
701.949	0.04	0.05	0.06
702.268	0.04	0.05	0.06
702.587	0.04	0.05	0.06
702.906	0.04	0.05	0.06
703.225	0.04	0.05	0.06
703.544	0.04	0.05	0.05
703.863	0.04	0.05	0.05
704.181	0.04	0.05	0.05
704.5	0.04	0.05	0.05
704.819	0.04	0.05	0.05
705.137	0.04	0.05	0.05
705.456	0.04	0.05	0.05
705.774	0.04	0.05	0.05
706.093	0.04	0.05	0.05
706.411	0.04	0.05	0.05
706.73	0.04	0.05	0.05
707.048	0.04	0.05	0.05
707.366	0.04	0.05	0.05
707.684	0.04	0.05	0.05
708.003	0.04	0.04	0.05
708.321	0.04	0.04	0.05
708.639	0.04	0.04	0.05
708.957	0.04	0.04	0.05
709.275	0.04	0.04	0.05
709.593	0.04	0.04	0.05
709.91	0.04	0.04	0.05
710.228	0.04	0.04	0.05
710.546	0.04	0.04	0.05
710.864	0.03	0.04	0.05
711.181	0.03	0.04	0.05
711.499	0.03	0.04	0.05
711.816	0.03	0.04	0.05
712.134	0.03	0.04	0.05
712.451	0.03	0.04	0.05
712.769	0.03	0.04	0.05
713.086	0.03	0.04	0.05
713.403	0.03	0.04	0.05
713.72	0.03	0.04	0.05
714.038	0.03	0.04	0.05
714.355	0.03	0.04	0.05
714.672	0.04	0.04	0.05
714.989	0.04	0.04	0.05
715.306	0.04	0.04	0.05
715.623	0.04	0.04	0.05
715.94	0.04	0.04	0.05
716.256	0.04	0.04	0.05
716.573	0.04	0.04	0.05
716.89	0.04	0.04	0.05
717.207	0.04	0.04	0.05
717.523	0.04	0.04	0.05
717.84	0.04	0.04	0.05
718.156	0.04	0.04	0.05
718.473	0.04	0.04	0.06
718.789	0.04	0.04	0.06
719.105	0.04	0.04	0.05
719.422	0.04	0.04	0.05
719.738	0.04	0.04	0.05
720.054	0.04	0.04	0.05
720.37	0.04	0.04	0.05
720.686	0.04	0.04	0.05
721.002	0.04	0.04	0.05
721.318	0.04	0.04	0.05
721.634	0.04	0.04	0.05
721.95	0.04	0.04	0.05
722.266	0.04	0.04	0.05
722.582	0.03	0.04	0.05
722.898	0.03	0.04	0.05
723.213	0.03	0.04	0.05
723.529	0.03	0.04	0.05
723.844	0.03	0.04	0.05
724.16	0.03	0.04	0.05
724.475	0.03	0.04	0.05
724.791	0.03	0.04	0.05
725.106	0.03	0.04	0.05
725.422	0.03	0.04	0.05
725.737	0.03	0.04	0.05
726.052	0.03	0.04	0.05
726.367	0.03	0.04	0.05
726.682	0.03	0.04	0.05
726.997	0.03	0.04	0.05
727.312	0.03	0.04	0.05
727.627	0.03	0.05	0.05
727.942	0.03	0.05	0.05
728.257	0.03	0.05	0.05
728.572	0.03	0.05	0.05
728.886	0.03	0.05	0.05
729.201	0.03	0.05	0.05
729.516	0.03	0.05	0.05
729.83	0.03	0.05	0.05
730.145	0.03	0.05	0.05
730.459	0.03	0.05	0.05
730.774	0.03	0.04	0.05
731.088	0.03	0.04	0.05
731.403	0.03	0.04	0.05
731.717	0.03	0.04	0.05
732.031	0.03	0.04	0.05
732.345	0.03	0.04	0.05
732.659	0.03	0.04	0.05
732.973	0.03	0.04	0.05
733.287	0.03	0.04	0.05
733.601	0.03	0.04	0.05
733.915	0.03	0.04	0.05
734.229	0.03	0.05	0.05
734.543	0.03	0.05	0.05
734.857	0.03	0.05	0.05
735.17	0.03	0.05	0.05
735.484	0.03	0.05	0.05
735.798	0.03	0.05	0.05
736.111	0.03	0.05	0.05
736.425	0.03	0.05	0.05
736.738	0.03	0.05	0.05
737.051	0.03	0.05	0.05
737.365	0.03	0.05	0.05
737.678	0.03	0.04	0.05
737.991	0.03	0.04	0.05
738.304	0.03	0.04	0.04
738.618	0.03	0.04	0.04
738.931	0.03	0.04	0.04
739.244	0.03	0.04	0.04
739.557	0.03	0.04	0.04
739.869	0.03	0.04	0.04
740.182	0.03	0.04	0.04
740.495	0.03	0.04	0.04
740.808	0.03	0.04	0.04
741.121	0.03	0.04	0.04
741.433	0.03	0.04	0.04
741.746	0.03	0.04	0.04
742.058	0.03	0.04	0.04
742.371	0.03	0.04	0.04
742.683	0.03	0.04	0.04
742.996	0.03	0.04	0.04
743.308	0.03	0.04	0.04
743.62	0.03	0.04	0.04
743.932	0.03	0.04	0.04
744.245	0.03	0.04	0.04
744.557	0.03	0.04	0.04
744.869	0.03	0.04	0.04
745.181	0.03	0.04	0.04
745.493	0.03	0.04	0.04
745.805	0.03	0.04	0.04
746.117	0.03	0.04	0.04
746.428	0.03	0.04	0.04
746.74	0.03	0.04	0.04
747.052	0.03	0.04	0.03
747.363	0.03	0.04	0.03
747.675	0.03	0.03	0.03
747.987	0.03	0.03	0.03
748.298	0.03	0.03	0.03
748.61	0.03	0.03	0.03
748.921	0.02	0.03	0.03
749.232	0.02	0.03	0.03
749.544	0.02	0.03	0.03
749.855	0.02	0.03	0.03
750.166	0.02	0.03	0.03
750.477	0.02	0.03	0.03
750.788	0.02	0.03	0.03

## Sheet: Figure 7
Aperature Radius (cm)	0.075g/l Bulk-Doped Light Gain/cm^2	0.65g/l Thin-Film Light Gain/cm^2
0.71	0.591904	0.670752
0.75	0.547643	0.617059
1	0.336	0.360758
1.25	0.225532	0.236492
1.5	0.166211	0.172852
1.75	0.128122	0.132374
2	0.10346	0.106642
2.25	0.0864982	0.0884632
2.5	0.074196	0.0760273
2.75	0.065015	0.0659354
3	0.0575922	0.0583475
3.25	0.0512834	0.0518194

## Sheet: Figure 8
Bend Radius (cm)	0.075g/l Bulk-Doped Bend Performace	0.075g/l Thin-Film Bend Performace	Theoretical Bend Performance
8	0.96456	0.958011	0.98
7	0.960652	0.916529	0.97
6	0.94812	0.912343	0.96
5	0.918609	0.916529	0.94
4	0.891255	0.867817	0.91
3	0.813367	0.828365	0.84
2	0.69492	0.775212	0.66

## Sheet: Figure 9
Wavelength (nm)	0.075g/l Bulk-Doped Waveguide Transmittance	0.65g/l Thin-Film Waveguide Transmittance
350.169	0.826959	0.869358
350.534	0.826959	0.869358
350.9	0.826959	0.869358
351.265	0.826959	0.869358
351.63	0.826959	0.869358
351.995	0.826959	0.869358
352.36	0.826959	0.869358
352.725	0.826959	0.860708
353.09	0.826959	0.869358
353.455	0.826959	0.869358
353.82	0.826959	0.869358
354.184	0.826959	0.869358
354.549	0.826959	0.869358
354.914	0.826959	0.869358
355.279	0.826959	0.869358
355.643	0.826959	0.869358
356.008	0.826959	0.869358
356.372	0.826959	0.869358
356.737	0.83527	0.869358
357.102	0.83527	0.869358
357.466	0.83527	0.869358
357.83	0.83527	0.869358
358.195	0.83527	0.869358
358.559	0.83527	0.869358
358.923	0.83527	0.869358
359.288	0.83527	0.869358
359.652	0.83527	0.869358
360.016	0.83527	0.869358
360.38	0.83527	0.869358
360.744	0.83527	0.869358
361.108	0.83527	0.869358
361.473	0.83527	0.869358
361.837	0.83527	0.869358
362.2	0.83527	0.869358
362.564	0.83527	0.869358
362.928	0.83527	0.869358
363.292	0.83527	0.869358
363.656	0.83527	0.869358
364.02	0.83527	0.869358
364.383	0.83527	0.869358
364.747	0.83527	0.869358
365.111	0.83527	0.869358
365.474	0.83527	0.869358
365.838	0.83527	0.869358
366.201	0.83527	0.869358
366.565	0.83527	0.869358
366.928	0.83527	0.869358
367.292	0.83527	0.869358
367.655	0.83527	0.869358
368.018	0.83527	0.869358
368.382	0.83527	0.869358
368.745	0.83527	0.869358
369.108	0.83527	0.869358
369.471	0.83527	0.869358
369.834	0.83527	0.869358
370.198	0.83527	0.869358
370.561	0.83527	0.869358
370.924	0.83527	0.869358
371.287	0.83527	0.869358
371.65	0.83527	0.869358
372.012	0.83527	0.869358
372.375	0.83527	0.869358
372.738	0.83527	0.869358
373.101	0.83527	0.869358
373.464	0.83527	0.869358
373.826	0.83527	0.869358
374.189	0.83527	0.869358
374.552	0.83527	0.869358
374.914	0.83527	0.869358
375.277	0.83527	0.869358
375.639	0.83527	0.869358
376.002	0.83527	0.869358
376.364	0.83527	0.869358
376.726	0.83527	0.869358
377.089	0.83527	0.869358
377.451	0.83527	0.869358
377.813	0.83527	0.869358
378.175	0.83527	0.869358
378.538	0.83527	0.869358
378.9	0.83527	0.869358
379.262	0.83527	0.869358
379.624	0.83527	0.869358
379.986	0.83527	0.869358
380.348	0.826959	0.869358
380.71	0.826959	0.869358
381.072	0.826959	0.869358
381.434	0.826959	0.869358
381.795	0.826959	0.869358
382.157	0.826959	0.869358
382.519	0.826959	0.869358
382.881	0.826959	0.869358
383.242	0.826959	0.869358
383.604	0.826959	0.860708
383.965	0.826959	0.860708
384.327	0.818731	0.860708
384.688	0.818731	0.860708
385.05	0.818731	0.860708
385.411	0.818731	0.860708
385.773	0.818731	0.860708
386.134	0.818731	0.860708
386.495	0.810584	0.860708
386.857	0.810584	0.860708
387.218	0.810584	0.860708
387.579	0.810584	0.860708
387.94	0.810584	0.860708
388.301	0.810584	0.852144
388.662	0.802519	0.852144
389.023	0.802519	0.852144
389.384	0.802519	0.852144
389.745	0.802519	0.852144
390.106	0.802519	0.852144
390.467	0.794534	0.852144
390.828	0.794534	0.852144
391.189	0.794534	0.852144
391.549	0.794534	0.843665
391.91	0.786628	0.843665
392.271	0.786628	0.843665
392.631	0.786628	0.843665
392.992	0.786628	0.843665
393.352	0.786628	0.843665
393.713	0.778801	0.843665
394.073	0.778801	0.843665
394.434	0.778801	0.83527
394.794	0.778801	0.83527
395.154	0.771052	0.83527
395.515	0.771052	0.83527
395.875	0.771052	0.83527
396.235	0.763379	0.83527
396.595	0.763379	0.826959
396.955	0.763379	0.826959
397.316	0.763379	0.826959
397.676	0.755784	0.826959
398.036	0.755784	0.826959
398.396	0.755784	0.818731
398.755	0.748264	0.818731
399.115	0.748264	0.818731
399.475	0.748264	0.818731
399.835	0.740818	0.818731
400.195	0.740818	0.818731
400.554	0.740818	0.818731
400.914	0.733447	0.810584
401.274	0.733447	0.810584
401.633	0.733447	0.810584
401.993	0.733447	0.810584
402.352	0.726149	0.810584
402.712	0.726149	0.802519
403.071	0.726149	0.802519
403.431	0.718924	0.802519
403.79	0.718924	0.802519
404.149	0.71177	0.802519
404.509	0.71177	0.794534
404.868	0.71177	0.794534
405.227	0.704688	0.794534
405.586	0.704688	0.794534
405.945	0.697676	0.794534
406.304	0.697676	0.786628
406.664	0.697676	0.786628
407.023	0.690734	0.786628
407.381	0.690734	0.786628
407.74	0.690734	0.778801
408.099	0.683861	0.778801
408.458	0.683861	0.778801
408.817	0.677057	0.778801
409.176	0.677057	0.778801
409.534	0.67032	0.771052
409.893	0.67032	0.771052
410.252	0.67032	0.771052
410.61	0.66365	0.771052
410.969	0.66365	0.763379
411.327	0.657047	0.763379
411.686	0.657047	0.763379
412.044	0.650509	0.763379
412.402	0.650509	0.755784
412.761	0.644036	0.755784
413.119	0.644036	0.755784
413.477	0.637628	0.755784
413.836	0.637628	0.748264
414.194	0.631284	0.748264
414.552	0.631284	0.748264
414.91	0.631284	0.748264
415.268	0.625002	0.740818
415.626	0.625002	0.740818
415.984	0.618783	0.740818
416.342	0.618783	0.740818
416.7	0.612626	0.733447
417.058	0.612626	0.733447
417.415	0.612626	0.733447
417.773	0.606531	0.733447
418.131	0.606531	0.726149
418.489	0.600496	0.726149
418.846	0.600496	0.726149
419.204	0.600496	0.726149
419.561	0.594521	0.726149
419.919	0.594521	0.718924
420.276	0.588605	0.718924
420.634	0.588605	0.718924
420.991	0.588605	0.718924
421.349	0.582748	0.718924
421.706	0.582748	0.718924
422.063	0.582748	0.71177
422.42	0.582748	0.71177
422.777	0.57695	0.71177
423.135	0.57695	0.71177
423.492	0.57695	0.71177
423.849	0.57695	0.71177
424.206	0.571209	0.71177
424.563	0.571209	0.704688
424.92	0.571209	0.704688
425.277	0.571209	0.704688
425.633	0.571209	0.704688
425.99	0.565525	0.704688
426.347	0.565525	0.704688
426.704	0.565525	0.704688
427.06	0.565525	0.704688
427.417	0.565525	0.697676
427.774	0.559898	0.697676
428.13	0.559898	0.697676
428.487	0.559898	0.697676
428.843	0.559898	0.697676
429.2	0.559898	0.697676
429.556	0.554327	0.697676
429.912	0.554327	0.697676
430.269	0.554327	0.697676
430.625	0.554327	0.690734
430.981	0.554327	0.690734
431.337	0.548812	0.690734
431.694	0.548812	0.690734
432.05	0.548812	0.690734
432.406	0.548812	0.690734
432.762	0.543351	0.690734
433.118	0.543351	0.690734
433.474	0.543351	0.683861
433.83	0.543351	0.683861
434.185	0.537944	0.683861
434.541	0.537944	0.683861
434.897	0.537944	0.683861
435.253	0.532592	0.683861
435.608	0.532592	0.677057
435.964	0.532592	0.677057
436.32	0.532592	0.677057
436.675	0.527292	0.677057
437.031	0.527292	0.677057
437.386	0.527292	0.677057
437.742	0.527292	0.677057
438.097	0.522046	0.67032
438.452	0.522046	0.67032
438.808	0.522046	0.67032
439.163	0.522046	0.67032
439.518	0.516851	0.67032
439.873	0.516851	0.67032
440.229	0.516851	0.67032
440.584	0.516851	0.67032
440.939	0.516851	0.67032
441.294	0.516851	0.67032
441.649	0.516851	0.67032
442.004	0.516851	0.67032
442.359	0.516851	0.67032
442.713	0.516851	0.67032
443.068	0.516851	0.67032
443.423	0.516851	0.67032
443.778	0.516851	0.67032
444.132	0.522046	0.67032
444.487	0.522046	0.67032
444.842	0.522046	0.67032
445.196	0.522046	0.677057
445.551	0.527292	0.677057
445.905	0.527292	0.677057
446.26	0.532592	0.677057
446.614	0.532592	0.683861
446.968	0.537944	0.683861
447.323	0.537944	0.683861
447.677	0.543351	0.690734
448.031	0.548812	0.690734
448.385	0.548812	0.690734
448.74	0.554327	0.697676
449.094	0.559898	0.697676
449.448	0.565525	0.704688
449.802	0.571209	0.704688
450.156	0.571209	0.71177
450.51	0.57695	0.71177
450.863	0.582748	0.718924
451.217	0.588605	0.718924
451.571	0.594521	0.726149
451.925	0.600496	0.726149
452.279	0.606531	0.733447
452.632	0.612626	0.733447
452.986	0.618783	0.740818
453.339	0.625002	0.740818
453.693	0.631284	0.748264
454.047	0.637628	0.748264
454.4	0.637628	0.755784
454.753	0.644036	0.755784
455.107	0.650509	0.763379
455.46	0.657047	0.763379
455.813	0.66365	0.771052
456.167	0.67032	0.771052
456.52	0.67032	0.778801
456.873	0.677057	0.778801
457.226	0.683861	0.778801
457.579	0.690734	0.786628
457.932	0.690734	0.786628
458.285	0.697676	0.794534
458.638	0.704688	0.794534
458.991	0.704688	0.794534
459.344	0.71177	0.802519
459.697	0.71177	0.802519
460.05	0.718924	0.802519
460.402	0.718924	0.802519
460.755	0.726149	0.810584
461.108	0.726149	0.810584
461.46	0.733447	0.810584
461.813	0.733447	0.810584
462.165	0.733447	0.818731
462.518	0.740818	0.818731
462.87	0.740818	0.818731
463.223	0.740818	0.818731
463.575	0.740818	0.818731
463.927	0.748264	0.818731
464.28	0.748264	0.818731
464.632	0.748264	0.826959
464.984	0.748264	0.826959
465.336	0.748264	0.826959
465.688	0.748264	0.826959
466.04	0.748264	0.826959
466.392	0.748264	0.826959
466.744	0.748264	0.826959
467.096	0.748264	0.826959
467.448	0.748264	0.826959
467.8	0.748264	0.826959
468.152	0.748264	0.826959
468.503	0.748264	0.826959
468.855	0.748264	0.826959
469.207	0.740818	0.818731
469.559	0.740818	0.818731
469.91	0.740818	0.818731
470.262	0.740818	0.818731
470.613	0.740818	0.818731
470.965	0.733447	0.818731
471.316	0.733447	0.818731
471.667	0.733447	0.818731
472.019	0.733447	0.810584
472.37	0.726149	0.810584
472.721	0.726149	0.810584
473.072	0.726149	0.810584
473.424	0.718924	0.810584
473.775	0.718924	0.810584
474.126	0.718924	0.802519
474.477	0.71177	0.802519
474.828	0.71177	0.802519
475.179	0.704688	0.802519
475.53	0.704688	0.802519
475.88	0.704688	0.794534
476.231	0.697676	0.794534
476.582	0.697676	0.794534
476.933	0.690734	0.794534
477.283	0.690734	0.786628
477.634	0.690734	0.786628
477.985	0.683861	0.786628
478.335	0.683861	0.786628
478.686	0.677057	0.786628
479.036	0.677057	0.778801
479.387	0.67032	0.778801
479.737	0.67032	0.778801
480.087	0.67032	0.778801
480.438	0.66365	0.771052
480.788	0.66365	0.771052
481.138	0.66365	0.771052
481.488	0.657047	0.771052
481.838	0.657047	0.771052
482.188	0.650509	0.771052
482.538	0.650509	0.763379
482.888	0.650509	0.763379
483.238	0.650509	0.763379
483.588	0.644036	0.763379
483.938	0.644036	0.763379
484.288	0.644036	0.763379
484.638	0.637628	0.755784
484.987	0.637628	0.755784
485.337	0.637628	0.755784
485.687	0.631284	0.755784
486.036	0.631284	0.755784
486.386	0.631284	0.755784
486.735	0.625002	0.748264
487.085	0.625002	0.748264
487.434	0.625002	0.748264
487.784	0.625002	0.748264
488.133	0.618783	0.748264
488.482	0.618783	0.748264
488.832	0.618783	0.748264
489.181	0.618783	0.748264
489.53	0.612626	0.740818
489.879	0.612626	0.740818
490.228	0.612626	0.740818
490.577	0.606531	0.740818
490.926	0.606531	0.740818
491.275	0.606531	0.740818
491.624	0.606531	0.733447
491.973	0.600496	0.733447
492.322	0.600496	0.733447
492.671	0.600496	0.733447
493.019	0.594521	0.733447
493.368	0.594521	0.733447
493.717	0.594521	0.726149
494.065	0.588605	0.726149
494.414	0.588605	0.726149
494.762	0.588605	0.726149
495.111	0.588605	0.726149
495.459	0.582748	0.726149
495.808	0.582748	0.718924
496.156	0.582748	0.718924
496.504	0.57695	0.718924
496.852	0.57695	0.718924
497.201	0.571209	0.718924
497.549	0.571209	0.71177
497.897	0.571209	0.71177
498.245	0.565525	0.71177
498.593	0.565525	0.71177
498.941	0.559898	0.704688
499.289	0.559898	0.704688
499.637	0.554327	0.704688
499.985	0.548812	0.697676
500.332	0.548812	0.697676
500.68	0.543351	0.697676
501.028	0.543351	0.690734
501.376	0.537944	0.690734
501.723	0.532592	0.690734
502.071	0.532592	0.683861
502.418	0.527292	0.683861
502.766	0.522046	0.677057
503.113	0.516851	0.677057
503.461	0.511709	0.677057
503.808	0.511709	0.67032
504.155	0.506617	0.67032
504.503	0.501576	0.66365
504.85	0.496585	0.66365
505.197	0.491644	0.657047
505.544	0.486752	0.657047
505.891	0.481909	0.650509
506.238	0.477114	0.650509
506.585	0.472367	0.644036
506.932	0.467666	0.637628
507.279	0.463013	0.637628
507.626	0.458406	0.631284
507.973	0.453845	0.631284
508.32	0.449329	0.625002
508.667	0.444858	0.625002
509.013	0.440432	0.618783
509.36	0.436049	0.612626
509.707	0.431711	0.612626
510.053	0.427415	0.606531
510.4	0.423162	0.600496
510.746	0.414783	0.600496
511.093	0.410656	0.594521
511.439	0.40657	0.594521
511.785	0.402524	0.588605
512.132	0.398519	0.582748
512.478	0.394554	0.582748
512.824	0.390628	0.57695
513.17	0.386741	0.571209
513.517	0.382893	0.571209
513.863	0.379083	0.565525
514.209	0.375311	0.565525
514.555	0.371577	0.559898
514.901	0.367879	0.554327
515.247	0.364219	0.554327
515.592	0.360595	0.548812
515.938	0.357007	0.548812
516.284	0.353455	0.543351
516.63	0.349938	0.543351
516.975	0.346456	0.537944
517.321	0.343009	0.537944
517.667	0.339596	0.532592
518.012	0.336216	0.532592
518.358	0.332871	0.527292
518.703	0.329559	0.527292
519.049	0.329559	0.522046
519.394	0.32628	0.522046
519.739	0.323033	0.522046
520.085	0.323033	0.516851
520.43	0.319819	0.516851
520.775	0.316637	0.511709
521.12	0.316637	0.511709
521.465	0.313486	0.511709
521.81	0.313486	0.511709
522.155	0.310367	0.506617
522.5	0.310367	0.506617
522.845	0.310367	0.506617
523.19	0.307279	0.506617
523.535	0.307279	0.506617
523.88	0.307279	0.506617
524.225	0.307279	0.501576
524.569	0.307279	0.501576
524.914	0.304221	0.501576
525.259	0.304221	0.501576
525.603	0.304221	0.501576
525.948	0.304221	0.501576
526.292	0.304221	0.501576
526.637	0.304221	0.501576
526.981	0.304221	0.501576
527.325	0.304221	0.501576
527.67	0.307279	0.501576
528.014	0.307279	0.501576
528.358	0.307279	0.506617
528.702	0.307279	0.506617
529.046	0.307279	0.506617
529.39	0.310367	0.506617
529.734	0.310367	0.506617
530.078	0.310367	0.506617
530.422	0.310367	0.506617
530.766	0.313486	0.511709
531.11	0.313486	0.511709
531.454	0.313486	0.511709
531.798	0.316637	0.511709
532.141	0.316637	0.511709
532.485	0.316637	0.516851
532.829	0.319819	0.516851
533.172	0.319819	0.516851
533.516	0.319819	0.516851
533.859	0.323033	0.516851
534.203	0.323033	0.522046
534.546	0.323033	0.522046
534.89	0.323033	0.522046
535.233	0.32628	0.522046
535.576	0.32628	0.522046
535.919	0.32628	0.522046
536.263	0.32628	0.522046
536.606	0.32628	0.522046
536.949	0.329559	0.522046
537.292	0.329559	0.522046
537.635	0.329559	0.527292
537.978	0.329559	0.527292
538.321	0.329559	0.522046
538.664	0.329559	0.522046
539.006	0.32628	0.522046
539.349	0.32628	0.522046
539.692	0.32628	0.522046
540.035	0.32628	0.522046
540.377	0.32628	0.522046
540.72	0.323033	0.522046
541.062	0.323033	0.516851
541.405	0.319819	0.516851
541.747	0.319819	0.516851
542.09	0.319819	0.516851
542.432	0.316637	0.511709
542.774	0.313486	0.511709
543.117	0.313486	0.511709
543.459	0.310367	0.506617
543.801	0.310367	0.506617
544.143	0.307279	0.506617
544.485	0.304221	0.501576
544.827	0.301194	0.501576
545.169	0.298197	0.496585
545.511	0.29523	0.496585
545.853	0.292293	0.491644
546.195	0.289384	0.491644
546.537	0.286505	0.486752
546.879	0.283654	0.481909
547.22	0.280832	0.481909
547.562	0.278037	0.477114
547.904	0.275271	0.472367
548.245	0.272532	0.472367
548.587	0.267135	0.467666
548.928	0.264477	0.463013
549.27	0.261846	0.458406
549.611	0.25924	0.458406
549.952	0.254107	0.453845
550.294	0.251579	0.449329
550.635	0.249075	0.444858
550.976	0.244143	0.440432
551.317	0.241714	0.440432
551.659	0.239309	0.436049
552	0.23457	0.431711
552.341	0.232236	0.427415
552.682	0.229925	0.423162
553.023	0.225373	0.423162
553.364	0.22313	0.418952
553.704	0.22091	0.414783
554.045	0.216536	0.410656
554.386	0.214381	0.40657
554.727	0.212248	0.40657
555.067	0.208045	0.402524
555.408	0.205975	0.398519
555.749	0.203926	0.394554
556.089	0.201897	0.390628
556.43	0.197899	0.390628
556.77	0.19593	0.386741
557.111	0.19398	0.382893
557.451	0.19205	0.379083
557.791	0.190139	0.379083
558.131	0.188247	0.375311
558.472	0.186374	0.371577
558.812	0.18452	0.371577
559.152	0.182684	0.367879
559.492	0.180866	0.367879
559.832	0.179066	0.364219
560.172	0.177284	0.360595
560.512	0.17552	0.360595
560.852	0.17552	0.357007
561.192	0.173774	0.357007
561.532	0.172045	0.357007
561.871	0.172045	0.353455
562.211	0.170333	0.353455
562.551	0.170333	0.353455
562.89	0.168638	0.349938
563.23	0.168638	0.349938
563.569	0.168638	0.349938
563.909	0.16696	0.349938
564.248	0.16696	0.349938
564.588	0.16696	0.346456
564.927	0.16696	0.346456
565.266	0.16696	0.346456
565.606	0.16696	0.346456
565.945	0.16696	0.346456
566.284	0.168638	0.349938
566.623	0.168638	0.349938
566.962	0.168638	0.349938
567.301	0.170333	0.349938
567.64	0.170333	0.349938
567.979	0.172045	0.353455
568.318	0.172045	0.353455
568.657	0.173774	0.357007
568.996	0.17552	0.357007
569.334	0.177284	0.360595
569.673	0.179066	0.360595
570.012	0.180866	0.364219
570.35	0.182684	0.367879
570.689	0.18452	0.367879
571.027	0.186374	0.371577
571.366	0.188247	0.375311
571.704	0.19205	0.379083
572.043	0.19398	0.382893
572.381	0.197899	0.386741
572.719	0.199888	0.390628
573.057	0.203926	0.394554
573.396	0.205975	0.398519
573.734	0.210136	0.402524
574.072	0.214381	0.40657
574.41	0.218712	0.410656
574.748	0.22313	0.414783
575.086	0.227638	0.418952
575.424	0.232236	0.423162
575.762	0.236928	0.431711
576.099	0.241714	0.436049
576.437	0.246597	0.440432
576.775	0.251579	0.449329
577.113	0.256661	0.453845
577.45	0.264477	0.458406
577.788	0.26982	0.463013
578.125	0.275271	0.472367
578.463	0.283654	0.477114
578.8	0.289384	0.486752
579.138	0.298197	0.491644
579.475	0.304221	0.496585
579.812	0.310367	0.506617
580.15	0.319819	0.511709
580.487	0.32628	0.522046
580.824	0.336216	0.527292
581.161	0.343009	0.532592
581.498	0.353455	0.543351
581.835	0.360595	0.548812
582.172	0.367879	0.559898
582.509	0.379083	0.565525
582.846	0.386741	0.571209
583.183	0.398519	0.582748
583.52	0.40657	0.588605
583.856	0.414783	0.594521
584.193	0.427415	0.606531
584.53	0.436049	0.612626
584.866	0.444858	0.618783
585.203	0.458406	0.631284
585.539	0.467666	0.637628
585.876	0.477114	0.644036
586.212	0.486752	0.657047
586.549	0.501576	0.66365
586.885	0.511709	0.67032
587.221	0.522046	0.677057
587.557	0.532592	0.683861
587.894	0.543351	0.690734
588.23	0.554327	0.697676
588.566	0.559898	0.704688
588.902	0.571209	0.71177
589.238	0.582748	0.718924
589.574	0.594521	0.726149
589.91	0.606531	0.733447
590.245	0.612626	0.740818
590.581	0.625002	0.748264
590.917	0.637628	0.755784
591.253	0.644036	0.763379
591.588	0.657047	0.771052
591.924	0.66365	0.771052
592.26	0.677057	0.778801
592.595	0.683861	0.786628
592.931	0.690734	0.794534
593.266	0.704688	0.802519
593.601	0.71177	0.802519
593.937	0.718924	0.810584
594.272	0.726149	0.818731
594.607	0.733447	0.818731
594.942	0.740818	0.826959
595.278	0.748264	0.83527
595.613	0.755784	0.83527
595.948	0.763379	0.843665
596.283	0.771052	0.843665
596.618	0.778801	0.852144
596.953	0.786628	0.852144
597.287	0.794534	0.860708
597.622	0.802519	0.860708
597.957	0.810584	0.869358
598.292	0.818731	0.869358
598.626	0.818731	0.878095
598.961	0.826959	0.878095
599.296	0.83527	0.878095
599.63	0.83527	0.88692
599.965	0.843665	0.88692
600.299	0.843665	0.88692
600.633	0.852144	0.895834
600.968	0.860708	0.895834
601.302	0.860708	0.895834
601.636	0.869358	0.904837
601.97	0.869358	0.904837
602.305	0.878095	0.904837
602.639	0.878095	0.904837
602.973	0.878095	0.913931
603.307	0.88692	0.913931
603.641	0.88692	0.913931
603.975	0.895834	0.913931
604.309	0.895834	0.913931
604.642	0.895834	0.923116
604.976	0.904837	0.923116
605.31	0.904837	0.923116
605.643	0.904837	0.923116
605.977	0.904837	0.923116
606.311	0.913931	0.923116
606.644	0.913931	0.932394
606.978	0.913931	0.932394
607.311	0.913931	0.932394
607.645	0.923116	0.932394
607.978	0.923116	0.932394
608.311	0.923116	0.932394
608.644	0.923116	0.932394
608.978	0.923116	0.932394
609.311	0.923116	0.932394
609.644	0.932394	0.932394
609.977	0.932394	0.941765
610.31	0.932394	0.941765
610.643	0.932394	0.941765
610.976	0.932394	0.941765
611.309	0.932394	0.941765
611.641	0.932394	0.941765
611.974	0.932394	0.941765
612.307	0.941765	0.941765
612.64	0.941765	0.941765
612.972	0.941765	0.941765
613.305	0.941765	0.941765
613.637	0.941765	0.941765
613.97	0.941765	0.941765
614.302	0.941765	0.941765
614.635	0.941765	0.941765
614.967	0.941765	0.941765
615.299	0.941765	0.941765
615.632	0.941765	0.941765
615.964	0.941765	0.941765
616.296	0.951229	0.951229
616.628	0.951229	0.951229
616.96	0.951229	0.951229
617.292	0.951229	0.951229
617.624	0.951229	0.951229
617.956	0.951229	0.951229
618.288	0.951229	0.951229
618.62	0.951229	0.951229
618.951	0.951229	0.951229
619.283	0.951229	0.951229
619.615	0.951229	0.951229
619.946	0.951229	0.951229
620.278	0.951229	0.951229
620.609	0.951229	0.951229
620.941	0.951229	0.951229
621.272	0.951229	0.951229
621.604	0.951229	0.951229
621.935	0.951229	0.951229
622.266	0.951229	0.951229
622.597	0.951229	0.951229
622.929	0.951229	0.951229
623.26	0.951229	0.951229
623.591	0.951229	0.951229
623.922	0.951229	0.951229
624.253	0.951229	0.951229
624.584	0.951229	0.951229
624.915	0.951229	0.951229
625.246	0.951229	0.951229
625.576	0.951229	0.951229
625.907	0.951229	0.951229
626.238	0.951229	0.951229
626.568	0.951229	0.951229
626.899	0.951229	0.951229
627.23	0.951229	0.951229
627.56	0.951229	0.951229
627.891	0.951229	0.951229
628.221	0.951229	0.951229
628.551	0.951229	0.951229
628.882	0.951229	0.951229
629.212	0.951229	0.951229
629.542	0.951229	0.951229
629.872	0.951229	0.951229
630.202	0.951229	0.951229
630.533	0.951229	0.951229
630.863	0.951229	0.951229
631.193	0.951229	0.951229
631.522	0.951229	0.951229
631.852	0.960789	0.951229
632.182	0.960789	0.951229
632.512	0.960789	0.951229
632.842	0.960789	0.951229
633.171	0.960789	0.951229
633.501	0.960789	0.951229
633.831	0.960789	0.951229
634.16	0.960789	0.951229
634.49	0.960789	0.951229
634.819	0.960789	0.951229
635.148	0.960789	0.951229
635.478	0.960789	0.951229
635.807	0.960789	0.951229
636.136	0.960789	0.951229
636.466	0.960789	0.951229
636.795	0.960789	0.951229
637.124	0.960789	0.951229
637.453	0.960789	0.951229
637.782	0.960789	0.951229
638.111	0.960789	0.951229
638.44	0.960789	0.951229
638.769	0.960789	0.951229
639.097	0.960789	0.951229
639.426	0.960789	0.951229
639.755	0.960789	0.951229
640.083	0.960789	0.951229
640.412	0.960789	0.951229
640.741	0.960789	0.951229
641.069	0.960789	0.951229
641.398	0.960789	0.951229
641.726	0.960789	0.951229
642.054	0.960789	0.951229
642.383	0.960789	0.951229
642.711	0.960789	0.951229
643.039	0.960789	0.951229
643.367	0.960789	0.951229
643.696	0.960789	0.951229
644.024	0.960789	0.951229
644.352	0.960789	0.951229
644.68	0.960789	0.951229
645.008	0.960789	0.951229
645.335	0.960789	0.951229
645.663	0.960789	0.951229
645.991	0.951229	0.951229
646.319	0.951229	0.951229
646.646	0.951229	0.951229
646.974	0.951229	0.951229
647.302	0.951229	0.951229
647.629	0.951229	0.951229
647.957	0.951229	0.951229
648.284	0.951229	0.951229
648.612	0.951229	0.951229
648.939	0.951229	0.951229
649.266	0.951229	0.951229
649.593	0.951229	0.951229
649.921	0.960789	0.951229
650.248	0.960789	0.951229
650.575	0.960789	0.951229
650.902	0.960789	0.951229
651.229	0.960789	0.951229
651.556	0.960789	0.951229
651.883	0.960789	0.951229
652.21	0.960789	0.951229
652.536	0.960789	0.951229
652.863	0.960789	0.951229
653.19	0.960789	0.951229
653.516	0.960789	0.951229
653.843	0.960789	0.951229
654.17	0.960789	0.951229
654.496	0.960789	0.951229
654.823	0.960789	0.951229
655.149	0.960789	0.951229
655.475	0.951229	0.951229
655.802	0.951229	0.951229
656.128	0.951229	0.951229
656.454	0.951229	0.951229
656.78	0.951229	0.951229
657.106	0.951229	0.951229
657.432	0.951229	0.951229
657.758	0.951229	0.951229
658.084	0.951229	0.951229
658.41	0.951229	0.951229
658.736	0.951229	0.951229
659.062	0.951229	0.951229
659.388	0.951229	0.951229
659.713	0.951229	0.951229
660.039	0.951229	0.951229
660.365	0.951229	0.951229
660.69	0.951229	0.951229
661.016	0.951229	0.951229
661.341	0.951229	0.951229
661.667	0.951229	0.951229
661.992	0.951229	0.951229
662.317	0.951229	0.951229
662.643	0.951229	0.951229
662.968	0.951229	0.951229
663.293	0.960789	0.951229
663.618	0.960789	0.951229
663.943	0.960789	0.951229
664.268	0.951229	0.951229
664.593	0.951229	0.951229
664.918	0.951229	0.951229
665.243	0.951229	0.951229
665.568	0.951229	0.951229
665.893	0.951229	0.951229
666.217	0.951229	0.951229
666.542	0.951229	0.951229
666.867	0.951229	0.951229
667.191	0.951229	0.951229
667.516	0.951229	0.951229
667.84	0.951229	0.951229
668.164	0.951229	0.951229
668.489	0.951229	0.951229
668.813	0.951229	0.951229
669.137	0.951229	0.951229
669.462	0.951229	0.951229
669.786	0.951229	0.941765
670.11	0.951229	0.941765
670.434	0.951229	0.941765
670.758	0.951229	0.941765
671.082	0.951229	0.951229
671.406	0.951229	0.951229
671.73	0.951229	0.951229
672.054	0.951229	0.951229
672.377	0.951229	0.951229
672.701	0.951229	0.951229
673.025	0.951229	0.951229
673.348	0.951229	0.951229
673.672	0.951229	0.951229
673.996	0.960789	0.951229
674.319	0.960789	0.951229
674.642	0.960789	0.951229
674.966	0.960789	0.951229
675.289	0.960789	0.951229
675.612	0.960789	0.951229
675.936	0.960789	0.951229
676.259	0.960789	0.951229
676.582	0.951229	0.951229
676.905	0.951229	0.951229
677.228	0.951229	0.951229
677.551	0.951229	0.951229
677.874	0.951229	0.951229
678.197	0.951229	0.951229
678.52	0.951229	0.951229
678.842	0.951229	0.951229
679.165	0.951229	0.951229
679.488	0.951229	0.951229
679.81	0.951229	0.951229
680.133	0.951229	0.951229
680.455	0.951229	0.951229
680.778	0.951229	0.951229
681.1	0.951229	0.951229
681.423	0.951229	0.951229
681.745	0.951229	0.951229
682.067	0.951229	0.951229
682.389	0.951229	0.951229
682.712	0.951229	0.951229
683.034	0.951229	0.951229
683.356	0.951229	0.951229
683.678	0.951229	0.951229
684	0.951229	0.951229
684.322	0.951229	0.951229
684.644	0.951229	0.951229
684.965	0.951229	0.951229
685.287	0.951229	0.951229
685.609	0.951229	0.951229
685.931	0.951229	0.951229
686.252	0.960789	0.951229
686.574	0.960789	0.951229
686.895	0.951229	0.951229
687.217	0.951229	0.951229
687.538	0.951229	0.951229
687.859	0.951229	0.951229
688.181	0.951229	0.951229
688.502	0.951229	0.951229
688.823	0.951229	0.951229
689.144	0.951229	0.951229
689.465	0.960789	0.951229
689.787	0.960789	0.951229
690.108	0.960789	0.951229
690.428	0.960789	0.951229
690.749	0.960789	0.951229
691.07	0.960789	0.951229
691.391	0.960789	0.951229
691.712	0.960789	0.951229
692.032	0.960789	0.951229
692.353	0.960789	0.951229
692.674	0.960789	0.951229
692.994	0.960789	0.951229
693.315	0.960789	0.951229
693.635	0.960789	0.951229
693.956	0.960789	0.951229
694.276	0.960789	0.951229
694.596	0.960789	0.951229
694.916	0.951229	0.951229
695.237	0.951229	0.951229
695.557	0.951229	0.951229
695.877	0.951229	0.951229
696.197	0.951229	0.951229
696.517	0.951229	0.951229
696.837	0.951229	0.951229
697.157	0.951229	0.951229
697.477	0.951229	0.951229
697.796	0.951229	0.951229
698.116	0.951229	0.951229
698.436	0.951229	0.951229
698.755	0.951229	0.951229
699.075	0.951229	0.951229
699.395	0.951229	0.941765
699.714	0.951229	0.941765
700.033	0.951229	0.941765
700.353	0.951229	0.941765
700.672	0.951229	0.941765
700.991	0.951229	0.941765
701.311	0.951229	0.941765
701.63	0.951229	0.941765
701.949	0.951229	0.941765
702.268	0.951229	0.941765
702.587	0.951229	0.941765
702.906	0.951229	0.941765
703.225	0.951229	0.941765
703.544	0.951229	0.951229
703.863	0.951229	0.951229
704.181	0.951229	0.951229
704.5	0.951229	0.951229
704.819	0.951229	0.951229
705.137	0.951229	0.951229
705.456	0.951229	0.951229
705.774	0.951229	0.951229
706.093	0.951229	0.951229
706.411	0.951229	0.951229
706.73	0.951229	0.951229
707.048	0.951229	0.951229
707.366	0.951229	0.951229
707.684	0.951229	0.951229
708.003	0.960789	0.951229
708.321	0.960789	0.951229
708.639	0.960789	0.951229
708.957	0.960789	0.951229
709.275	0.960789	0.951229
709.593	0.960789	0.951229
709.91	0.960789	0.951229
710.228	0.960789	0.951229
710.546	0.960789	0.951229
710.864	0.960789	0.951229
711.181	0.960789	0.951229
711.499	0.960789	0.951229
711.816	0.960789	0.951229
712.134	0.960789	0.951229
712.451	0.960789	0.951229
712.769	0.960789	0.951229
713.086	0.960789	0.951229
713.403	0.960789	0.951229
713.72	0.960789	0.951229
714.038	0.960789	0.951229
714.355	0.960789	0.951229
714.672	0.960789	0.951229
714.989	0.960789	0.951229
715.306	0.960789	0.951229
715.623	0.960789	0.951229
715.94	0.960789	0.951229
716.256	0.960789	0.951229
716.573	0.960789	0.951229
716.89	0.960789	0.951229
717.207	0.960789	0.951229
717.523	0.960789	0.951229
717.84	0.960789	0.951229
718.156	0.960789	0.951229
718.473	0.960789	0.941765
718.789	0.960789	0.941765
719.105	0.960789	0.951229
719.422	0.960789	0.951229
719.738	0.960789	0.951229
720.054	0.960789	0.951229
720.37	0.960789	0.951229
720.686	0.960789	0.951229
721.002	0.960789	0.951229
721.318	0.960789	0.951229
721.634	0.960789	0.951229
721.95	0.960789	0.951229
722.266	0.960789	0.951229
722.582	0.960789	0.951229
722.898	0.960789	0.951229
723.213	0.960789	0.951229
723.529	0.960789	0.951229
723.844	0.960789	0.951229
724.16	0.960789	0.951229
724.475	0.960789	0.951229
724.791	0.960789	0.951229
725.106	0.960789	0.951229
725.422	0.960789	0.951229
725.737	0.960789	0.951229
726.052	0.960789	0.951229
726.367	0.960789	0.951229
726.682	0.960789	0.951229
726.997	0.960789	0.951229
727.312	0.960789	0.951229
727.627	0.951229	0.951229
727.942	0.951229	0.951229
728.257	0.951229	0.951229
728.572	0.951229	0.951229
728.886	0.951229	0.951229
729.201	0.951229	0.951229
729.516	0.951229	0.951229
729.83	0.951229	0.951229
730.145	0.951229	0.951229
730.459	0.951229	0.951229
730.774	0.960789	0.951229
731.088	0.960789	0.951229
731.403	0.960789	0.951229
731.717	0.960789	0.951229
732.031	0.960789	0.951229
732.345	0.960789	0.951229
732.659	0.960789	0.951229
732.973	0.960789	0.951229
733.287	0.960789	0.951229
733.601	0.960789	0.951229
733.915	0.960789	0.951229
734.229	0.951229	0.951229
734.543	0.951229	0.951229
734.857	0.951229	0.951229
735.17	0.951229	0.951229
735.484	0.951229	0.951229
735.798	0.951229	0.951229
736.111	0.951229	0.951229
736.425	0.951229	0.951229
736.738	0.951229	0.951229
737.051	0.951229	0.951229
737.365	0.951229	0.951229
737.678	0.960789	0.951229
737.991	0.960789	0.951229
738.304	0.960789	0.960789
738.618	0.960789	0.960789
738.931	0.960789	0.960789
739.244	0.960789	0.960789
739.557	0.960789	0.960789
739.869	0.960789	0.960789
740.182	0.960789	0.960789
740.495	0.960789	0.960789
740.808	0.960789	0.960789
741.121	0.960789	0.960789
741.433	0.960789	0.960789
741.746	0.960789	0.960789
742.058	0.960789	0.960789
742.371	0.960789	0.960789
742.683	0.960789	0.960789
742.996	0.960789	0.960789
743.308	0.960789	0.960789
743.62	0.960789	0.960789
743.932	0.960789	0.960789
744.245	0.960789	0.960789
744.557	0.960789	0.960789
744.869	0.960789	0.960789
745.181	0.960789	0.960789
745.493	0.960789	0.960789
745.805	0.960789	0.960789
746.117	0.960789	0.960789
746.428	0.960789	0.960789
746.74	0.960789	0.960789
747.052	0.960789	0.970446
747.363	0.960789	0.970446
747.675	0.970446	0.970446
747.987	0.970446	0.970446
748.298	0.970446	0.970446
748.61	0.970446	0.970446
748.921	0.970446	0.970446
749.232	0.970446	0.970446
749.544	0.970446	0.970446
749.855	0.970446	0.970446
